# Supplementary material for: Are EARLINET and AERONET climatologies consistent? The caseof Thessaloniki, Greece
Source: Copernicus journal article supplement (doi:10.5194/acp-2017-1218), 2018-02-13
Supplement: Supplementary file [file acp-2017-1218-AC2-supplement.pdf]

Interactive comment on “Are EARLINET and AERONET climatologies consistent? The case of Thessaloniki, Greece” by Nikolaos Siomos et al.  
Anonymous Referee #2  
Received and published: 13 March 2018

We would like to thank the reviewer for his/her fruitful comments that helped to improve the manuscript.

In this study the authors present results from the climatological behavior of the aerosol optical properties over Thessaloniki during the years 2003-2017. Two independent datasets, representing two individual networks, the EARLINET and the AERONET, were applied to investigate the consistency and the statistical significance between both networks using geometrical and optical properties of aerosols. The analysis show a decreasing on AOD at 355 nm trends of -21.0% and -16.6% per decade for the EARLINET and the AERONET, respectively. Also, results show the dominance of dust and biomass burning on the free troposphere during summer. Different from other studies that considered only short time periods such as four or six years, and only one single kind of instruments (Lidar Raman), this study presented very important results of climatological studies of 14 years using two well establish networks. Overall, the manuscript is well well-organized and clearly presented. I'd like to suggest the acceptance of this manuscript after some revisions.

#### General comments

After taking into account the feedback from all the reviewers we decided to proceed to the following major changes in the revised version of the manuscript.

- The Version 3, level 2.0 AERONET products replaced Version 2, level 1.5 products since they were recently published. When using Version 2, we preferred level 1.5 products because the AERONET timeseries was longer, starting at 2003. We noticed, however, that data in the period 2003-2005 that used to be categorized as Level 1.5 in Version 2 now are flagged as Level 2.0. Consequently, we decided to switch to level 2.0.
- The backscatter coefficient profiles and their respective columnar products (INTB) have been removed from Figure 3, Figure 4 and section 4. We deemed that these products were not providing any significant additional information and the comparison of the sunphotometer AOD at 355nm with the lidar INTB at 355nm caused unnecessary confusion. The section's text has been modified accordingly.
- The aerosol optical properties analysis is now performed using solely night-time measurements. Since the backscatter products have been excluded, this mainly affects BAE355-532. We preferred this approach in order to improve homogeneity as the lidar ratio, a night-time product, is usually discussed hand-by-hand with BAE in the manuscript.
- A new paragraph that addresses sampling and consistency issues between the lidar and sunphotometer AOD at 355nm timeseries has been added. A number of tests has been performed in order to quantify the systematic biases that arise due to day/night differences and the fact that the lidar profiles typically start above 0.6km even if an overlap function is applied. The impact of the much lower resolution of the lidar sampling is also investigated.
- While re-processing the data, we detected and corrected some bugs that mainly affected the detection of the extreme values, the common boundaries of the two timeseries for the trend analysis and how the Mann-Kendal test had been applied. All the tables, figures and numeric values have been updated accordingly.

Section 2.1 The Lidar setup – page 3 – lines 16 to 19.

The authors use the Lidar data set between 2003 to 2017 and states, “since a long timeseries of data was necessary, only the extinction 355nm and the backscatter 355nm and 532nm products were included in the analysis. The dataset included in this study covers the period 2003-2017 in order to be chronologically consistent with the sunphotometer dataset.”

The Lidar dataset used is from 2003 to 2017. It is well known that EARLINET has a well established standard pattern of quality assurance tests such as dark current, bin-shift, zero bin, trigger delay corrections, Telecover tests, Rayleigh fit, etc. Since when these tests are applied to Thessaloniki EARLINET station? Since 2003? What is the influence of these tests on the results of your comparisons? What type of errors or uncertainties the lack of these tests for the early dataset can take into account?

These test are currently incorporated in EARLINET’s quality assurance internal checkups. Their main purpose is to report the status and monitor the stability of the system within the network. Submitting those tests once per year is mandatory for all the stations since 2012. However, most of these tests have been routinely performed in individual stations even before 2012. The dark current, bin-shift, trigger delay and Rayleigh fit test have been performed since 2001 in the station of Thessaloniki. The Rayleigh fit test, an essential diagnostic, allows us to determine if the lidar beam is aligned with the telescope axis. It is performed each time a measurement is processed. The dark current test has been typically performed before each measurement. The telecover test has been introduced in 2008 (Freudenthaler et al. 2008). It is a diagnostic tool used to determine the full overlap height of the each system channel with accuracy. It reveals more information on the origin of the overlap effect but it is not applied as a correction to the lidar products. The method of Wandinger at al. 2002 has been applied to our data since 2001 in order to determine the overlap function and consequently the full overlap height per Raman case. The following sentence has been added in section 3.1.

“Additionally, some quality standards have been established, in order to make the lidar products of the different systems comparable and to be able to provide quality-assured data sets of network products Freudenthaler et al. 2018.”

Section 2.2 The sunphotometer - page 3 – lines 25 to 26

“The level 1.5 aerosol optical depth values (AOD) at 440nm and the angstrom exponent 440-670 during the period 2003-2017 were used in this study. The AOD at 440nm is preferred for the comparison with the lidar UV products in order to take advantage of the longer time series since the 340nm and 380nm channels were added in 2005.”

Why not to use Level 2.0 data? What would be the differences on the trend results using the level 2.0 since it is quality assured; the final post-deployment calibration values are applied to the data set, and the aerosol optical depth data are inspected for possible cloud contaminated outliers. For AERONET level 1.5 data, when Angstrom parameter computed using all available channels between 440 and 870 nm is greater than -0.1 the point is considered cloud and pointing error free. Is the Level 1.5 AERONET data used for this study filtered using this assumption?

Taking into account the reviewer’s suggestions, we have switched to Version 3 level 2.0 products in the revised version of the manuscript (see general comments above).

Section 2.2 The sunphotometer - page 3 – lines 26 to 28

“The AOD at 440nm is preferred for the comparison with the lidar UV products in order to take advantage of the longer time series since the 340nm and 380nm channels were added in 2005.”

You add 2 year more on your climatology (2003 and 2004, since the 340nm and 380nm channels were added in 2005). How is the difference in your result considering these 2 years more?

We have overcome this issue by using the Version 3 AERONET products (see previous comment).

Subsection 4.2.1 - Aerosol Optical Depth – page 9 – 20 to 23

“The AOD cycle in the PBL and in the FT is presented in figure 3b. The contribution from the free troposphere seems to be comparable and even higher than the PBL contribution during April and the summer months. This is probably attributed to transported biomass burning aerosol during summer and spring in the FT (see section 4.2.2.4) The other months, especially March, exhibit a lower FT contribution.”

It is possible to obtain some result or correlation of the biomass burning aerosol transported on the free troposphere using only AERONET AOD values?

There are techniques that allow the aerosol typing based on sunphotometer measurement (Hamill et al., 2016). However, they are not yet integrated in our routine processing algorithms. We plan to separate the desert dust and the biomass burning cases for both datasets in the future in order to analyze separately the long term trends of the transported aerosol cases.

Or considering the annual cycle of the monthly mean columnar products of AOD at 355nm in the whole column presented on figure 3 (a), is possible that AERONET is missing any aerosol layer on the free troposphere? How could it affect the results of the decreasing trends?

Indeed, since the sunphotometer measurements are performed during the day and the lidar Raman measurements during the night, a systematic bias could be introduced. Additionally, the fact that, even after applying an overlap correction, our profiles seldom extend below 0.6km, could also contribute to this systematic bias. This bias is expected to produce an offset and/or seasonal discrepancies between the two datasets. Furthermore, an artificial trend could also be introduced to the lidar timeseries if the bias is non-periodically time-dependent. Changes in the systems overlap within the timeseries could produce such an effect. In order to investigate the aforementioned issues we isolate the common daily averages between the two datasets to ensure that only the overlap issues and the day/night discrepancies would contribute to the bias. We have computed the AOD at 355nm biases by subtracting the sunphotometer daily mean AOD from the lidar daily mean AOD per case. The seasonal biases and the total bias are calculated with a methodology similar to the one applied to the lidar and sunphotometer measurements. Spring and autumn biases are close to zero with values at 0.03 and -0.01 respectively. The winter seasonal bias is -0.15 while the summer bias is 0.13. The total bias is close to zero, at -0.003. Consequently, there is a minor offset towards slightly lower lidar AODs between the two annual cycles and a systematic estimation of higher lidar AOD values in summer and lower lidar AOD values in winter. This behavior is already visible in the monthly annual cycles (figure 4a), especially for summer. As far as the long term trend analysis is considered, even if the sunphotometer and the lidar AOD exhibit different seasonal patterns, we don't expect the trend values to be much affected since the seasonality has been removed from each timeseries individually (see section 4.4). The trend could only be affected by a non-periodical time dependence in the bias. We examine such effects by calculating the trend of the seasonal bias after removing the bias seasonality. We estimate a

decreasing AOD<sub>355</sub> trend of -00024 per year. A Mann-Kendal test is performed in order to check the significance of the this trend. It results to a p-value of 0.14 and therefore the trend hypothesis is rejected at the 5% acceptance interval. As a result, the long term trend of the lidar AOD should be free of systematic biases. A new paragraph (section 4.5) has been added in the manuscript describing the aforementioned findings.

Subsection 4.2.2 Integrated Backscatter – page 9 – lines 25 to 27

“Another columnar optical product, the integrated backscatter (INTB) at 355nm and at 532nm, is presented in figure 3c and 3d. The AERONET equivalent is calculated by dividing the AOD at 355nm and at 532nm with a constant lidar ratio of 50 sr and it is also included in the figures.”

What kind of error uncertainties and/or bias the authors could expect using the fixed Lidar ratio of 50 sr to calculate in INTB for the AERONET data? Since the the lidar ratio at 355 nm ranging from 45 to 70 sr according to statement on lines 2 and 3 of page 10, why not to use a mean fixed lidar ratio of 57 or 58 sr to calculate the AERONET integrated backscatter?

Indeed, in order to present the AERONET AOD<sub>355</sub> together with the EARLINET INTB<sub>355</sub> an assumption of a constant lidar ratio is required. Initially, we were more interested in comparing the general shape of the two annual cycles. The major benefit using the INTB<sub>355</sub> could provide over using the AOD<sub>355</sub> is that more EARLINET cases would be included (daytime measurements). Despite that, we decided that this is confusing and not really necessary for the study. Consequently, the Subsection 4.2.2 and Figure 3 (c, d) have been excluded from the manuscript (see general comments above).

One thing that is not clear on the manuscript is the consideration about the column AOD comparison between AERONET data, that performs measurements during daytime, and the AOD from Raman Lidar measured during the nighttime. What kind of correction or assumption the authors take into account for these cases?

The reviewer is right. We have included a new paragraph (section 4.5) in the revised manuscript where such issues are discussed (see the general comments and the previous response concerning the biases)

# Are EARLINET and AERONET climatologies consistent? The case of Thessaloniki, Greece

Nikolaos Siomos<sup>1</sup>, Dimitris S. Balis<sup>1</sup>, Kalliopi A. Voudouri<sup>1</sup>, Eleni Giannakaki<sup>2,4</sup>, Maria Filioglou<sup>1,2</sup>, Vassilis Amiridis<sup>3</sup>, Alexandros Papayannis<sup>5</sup>, and Konstantinos Fragkos<sup>6</sup>

<sup>1</sup>Laboratory of atmospheric physics, Physics Department, Aristotle University of Thessaloniki, Greece, \*Email: nsiomos@physics.auth.gr

<sup>2</sup>Finnish Meteorological Institute, Atmospheric Research Center of Eastern Finland, Kuopio, Finland

<sup>3</sup>Institute for Astronomy, Astrophysics, Space Applications and Remote Sensing, National Observatory of Athens, Athens, Greece

<sup>4</sup>Department of Environmental Physics and Meteorology, Faculty of Physics, University of Athens, Greece

<sup>5</sup>National Technical University of Athens, Physics Department, Laser Remote Sensing Laboratory, Athens, Greece

<sup>6</sup>National Institute of R&D in Optoelectronics, Magurele, Romania

*Correspondence to:* N. Siomos (nsiomos@physics.auth.gr)

**Abstract.** In this study we investigate the climatological behavior of the aerosol optical properties over Thessaloniki during the years 2003-2017. For this purpose, measurements of two independent instruments, a lidar and a sunphotometer, were used. These two instruments represent two individual networks, the European Lidar Aerosol Network (EARLINET) and the Aerosol Robotic Network (AERONET). They include different measurement schedules. Fourteen years of lidar and sunphotometer measurements were analyzed, independently of each other, in order to obtain the annual cycles and trends of ~~multiple-various~~ optical and geometrical aerosol properties in the boundary layer, in the free troposphere and for the whole atmospheric column. The analysis resulted in consistent statistically significant and decreasing AOD 355nm trends of ~~-21.0% and -16.6%~~ -23.2% and -22.3% per decade in the study period over Thessaloniki for the EARLINET and the AERONET datasets respectively. Therefore, the analysis ~~implies-indicates~~ that the EARLINET sampling schedule can be quite effective in producing data that can be applied to long-term climatological studies. It ~~has also been confirmed-is also shown~~ that the observed decreasing trend is mainly attributed to changes in the aerosol ~~properties-load~~ inside the boundary layer. Seasonal profiles of the most dominant aerosol mixture types observed over Thessaloniki have been generated from the lidar data. The higher values of the ~~extinction~~ vertical-resolved extinction coefficient at 355nm appear in summer, while the lower ones appear in winter. The dust component is ~~much~~ more dominant in the free troposphere than in the boundary layer during summer ~~while the opposite is observed in~~ winter. The strongest biomass burning episodes tend to occur during summer. The biomass burning layers tend to arrive in the free troposphere ~~and are probably attributed to wildfires rather than agricultural fires that are predominant~~ during spring and ~~autumn~~ summer. This kind of information can be quite useful for applications that require a priori aerosol profiles. For instance, they can be utilized in models that require aerosol climatological data as input, in the development of algorithms for satellite products, and also in passive remote sensing techniques that require knowledge of the aerosol vertical distribution.

## 1 Introduction

The atmospheric ~~partieles typically show~~ aerosol load typically shows a significant spatial and temporal variability within the lower atmosphere (e.g., Hamill et al., 2016). This is related both to the plethora of aerosol emission sources near the ground and to the variable weather conditions that appear in the troposphere. Since ~~the transportation transport~~ is driven by the ~~wind~~ circulationatmospheric conditions, the aerosol properties over a given location are expected to follow annual and climatological patterns just as the wind does (e.g., Takemura et al., 2002). Similar patterns can be observed in the emission sources as well (e.g., Stefan et al., 2013). As a matter of fact, a lot of human activities, that result to the emission of anthropogenic aerosols, exhibit annual cycles (e.g., Yiquan et al., 2015). This is also true for the natural emissions that are usually driven by the weather conditions (e.g., Israelevich et al., 2012). The knowledge of the climatological behavior of particles in the troposphere can be utilized in many different ways. Its applications can range from purely scientific, such as the validation of aerosol transportation and air quality models (~~Biniotoglou et al., 2015; Siomos et al., 2017~~) (e.g., Biniotoglou et al., 2015; Siomos et al., 2017) and satellite instruments (~~Balis et al., 2016~~) (e.g., Balis et al., 2016) to civil oriented, for example the impact of the aerosol load on human health (~~Mauderly and Chow, 2008; Löndahl et al., 2010~~) (e.g., Mauderly and Chow, 2008; Löndahl et al., 2010), airfare safety (~~Brenot et al., 2014~~) and agriculture (~~Gerstl and Zardecki, 1982~~) (e.g., Brenot et al., 2014) and agriculture (e.g., Gerstl and Zardecki, 1982).

In order to conduct a climatology study, long-term scheduled measurements are required. ~~The in situ techniques are usually focused~~ In situ techniques focus on measurements of the ~~surface aerosol properties since it~~ aerosol properties close the ground. It is both challenging and costly to acquire those measurements in high altitudes (i.e. mounted on airplanes and unmanned aerial vehicles), especially on a routine basis. For those reasons, the application of remote sensing techniques from ground based instruments is usually preferred. Lidar systems are ideal when the vertical distribution is being investigated (e.g., Klett, 1981; She et al., 1992; Ansmann et al., 1992; Welton et al., 2001; Hirsikko et al., 2013). Passive remote sensing instruments are also broadly used in order to examine the columnar aerosol properties (~~Dubovik and King, 2000; Hönninger et al., 2004; Schneider et al., 2008; Herman et al., 2017; López-Solano et al., 2017~~) (e.g., Dubovik and King, 2000; Hönninger et al., 2004; Schneider et al., 2008; Herman et al., 2017; López-Solano et al., 2017).

Previous climatological studies using ~~raman lidar measurements~~ Raman lidar measurements at Thessaloniki were conducted by Amiridis et al. (2005) and Giannakaki et al. (2010) ~~in Thessaloniki during covering~~ the periods 2001-2004 and 2001-2007 respectively. ~~Matthias and Bösenberg (2002), analyzed the boundary layer height in Hamburg using three years of lidar data while Behnert et al. (2007) used sunphotometer and lidar measurements during the period 2000-2003 in order to obtain climatological results for the southern North sea area. In all those cases, the timeseries mentioned above did not cover enough years for the production of long-term~~ These studies focus on the seasonal variability of various aerosol optical properties inside the planetary boundary layer and in the free troposphere, separately for the predominant aerosol mixtures. For example, Amiridis et al. (2005) have found a seasonal pattern in the columnar AOD, with higher values occurring mainly in early spring and late summer due to an enhanced free tropospheric contribution, while Giannakaki et al. (2010) observed larger optical depth values for Saharan dust and smoke particles. However, the limited number of years did not permit the calculation of long

term trends. On the other hand, Kazadzis et al. (2007) and Fountoulakis et al. (2016) analyzed longer datasets ~~for Thessaloniki~~ based on spectral irradiance measurements for Thessaloniki, that allowed them to investigate the long-term variability and the annual cycles of the aerosol optical depth in the UV for Thessaloniki ~~using retrieved~~. They used retrievals of AOD from two different Brewer spectrophotometers in the periods 1997-2005 and 1994-2006 respectively. For instance, Kazadzis et al. (2007)  
5 detected a seasonal variation in the monthly means of AOD at 340nm with maximum optical depth values in the summer months and minimum in wintertime, while Fountoulakis et al. (2016) detected an AOD at 320nm trend of  $-0.09 \pm 0.01$  per decade. In their case, however, it was not possible to provide information on the aerosol vertical distribution due to the nature of their instrumentation.

In this study we have investigated the climatological behavior of the aerosol optical and geometrical properties over Thessa-  
10 loniki during the ~~years-period 1st of June 2003 to 31st of May 2017, which, hereafter, will be referred to as "period 2003-2017"~~. We have used the measurements of two independent datasets that represent two individual networks with different measurement schedules ~~and techniques~~.

The first dataset includes measurements performed with a ~~raman~~ Raman lidar in Thessaloniki, Greece ( $40.63^{\circ}$  N,  $22.96^{\circ}$  E). This instrument is part of the European Aerosol Lidar Network (EARLINET). The EARLINET schedule for climatological  
15 measurements is adopted (e.g., Giannakaki et al., 2010) and measurements are systematically performed every Monday morning preferably close to 12 UTC, and every Monday and Thursday evening ~~after the sunset. The second one,~~ preferably after sunset, resulting in 302 days with measurements. After the CALIPSO mission in 2006, lidar measurements have also been performed during the CALIPSO overpasses (Winker et al., 2009; Gelsomina et al.), resulting in 73 additional days with lidar data. Finally, depending on the station's needs, measurements are performed during special events, resulting to 143 additional  
20 days of data. The full dataset includes 518 days when at least one lidar profile is available. The second dataset includes data measured with a CIMEL sunphotometer that is part of the Aerosol Robotic Network (AERONET). Measurements are automatically performed every ~~few minutes~~ 15 minutes or less, depending on the sun's zenith angle (Holben et al., 1998; Dubovik and King, 2000). By using these data, the long-term variability, ~~annual cycles~~ the annual cycles, and trends of ~~multiple various~~ optical, and geometrical properties have been examined. Furthermore, we have separately investigated the climatological behavior of aerosols  
25 in the planetary boundary layer (PBL) and in the free troposphere (FT). Taking into account the different sampling rate of the two datasets and the different measurement techniques, the aim of our study was to ultimately reach a more solid conclusion regarding the capability of the two datasets to produce consistent climatological patterns, when analyzed independently of each other. It is not in our intent to perform a point by point comparison of coincident in time measurements between the two techniques. However, the uncertainties involved in producing the climatological datasets are discussed in section 4.5.

## 30 2 Instrumentation and tools

### 2.1 The lidar system

The setup of the lidar system is discussed in this section. It belongs to the Laboratory of Atmospheric Physics that is located in the Physics department of the Aristotle university of Thessaloniki (~~40.5~~  $40.63^{\circ}$  N, ~~22.9~~  $22.96^{\circ}$  E) at an elevation of 50 m. ~~It~~ The



first (1064nm), second (532nm) and third harmonic (355nm) frequency of a compact, pulsed Nd:YAG laser are emitted with a 10 Hz repetition rate (more technical details can be found on (Amiridis et al., 2005)). The radiation from the atmospheric backscattering of the laser beam is collected with a 500 mm diameter telescope. The lidar has been part of EARLINET (Schneider et al., 2000; Pappalardo et al., 2014) since 2000. The original setup of the ~~raman~~ Raman lidar in 2000 included two elastic channels at 355nm and 532nm and a ~~raman~~ Raman channel at 387nm (Amiridis et al., 2005). More channels were added later on. An additional ~~raman~~ Raman channel at 607nm was added in 2008. Another elastic channel at 1064nm plus one parallel and one cross polarization channel at 532nm were added in ~~2012~~ 2012 (Siomos et al., 2017). The final products, which derived from the raw lidar data processing (see section 3.13.2) are the aerosol backscatter coefficient at 355nm, 532nm and 1064nm and the aerosol extinction coefficient at 355nm and at 532nm. ~~Moreover, the atmospheric volume and particle depolarization ratios can potentially be obtained but due to technical issues these products are currently not available for Thessaloniki. Since a long timeseries of data was necessary, only the extinction 355nm and the backscatter 355nm and 532nm products were included in the analysis.~~ The dataset included in this study covers the period 2003-2017 in order to be chronologically consistent with the sunphotometer dataset (see section 2.2). All of the aforementioned products are publicly available in the EARLINET database (<https://www.earlinet.org>).

## 2.2 Lidar overlap function

A common source of uncertainty when dealing with lidar data is the system's overlap function that determines the altitude above which a profile contains trustworthy values. For simplicity we will refer to this altitude as "starting height" in the manuscript. In our analysis, if a correction is not available for the system's overlap, the starting height is set to the full overlap height. This is true for all our daytime elastic backscatter profiles and the night-time elastic backscatter 532nm profiles prior to 2008. The starting height is below 1.5 km for 86% of those profiles. The Raman extinction profiles are much more sensitive to the overlap effect (see section 3.2). The method of Wandinger and Ansmann (2002) is applied if Raman profiles are available and the overlap function is calculated and applied individually per Raman case. The correction is also applied to the night-time elastic backscatter at 1064nm that became available in 2012. The calculated overlap function can be trusted for values greater than 0.7 (Amiridis et al., 2005). In those profiles, the starting height is set to the altitude where the overlap equals 0.7, resulting in values below 1.5km for 90% of the overlap corrected profiles. For the calculation of the columnar properties, a constant profile is assumed from the starting height to the ground. This introduces uncertainties in the calculation of the AOD. The impact of these uncertainties in the climatological analysis will be discussed in section 4.5.

## 2.3 The sunphotometer

The CIMEL multiband sun-sky photometer was installed in Thessaloniki in 2003 as part of the AERONET Global Network. It is located at the same altitude as the lidar system. Their distance is less than 50 m. It performs direct solar irradiance and sky radiance measurements at 340, 380, 440, 500, 670, 870, and ~~1020 nm~~ 1020nm automatically during the day. The AERONET inversion algorithms (Dubovik and King, 2000; Dubovik et al., 2006) are applied automatically to the raw data. The products are publicly available online (<https://aeronet.gsfc.nasa.gov>). The level ~~1.5~~ 2.0 Version 3 aerosol optical depth values (AOD)



at ~~440nm and the angstrom exponent 440-670 during 440, 675, 870 and 1020nm in~~ the period 2003-2017 were used in this study. ~~The AOD at 440nm is preferred for the comparison with the lidar UV products~~ in order to take advantage of the longer timeseries since the 340nm and 380nm channels were added ~~in 2005. later, in 2005 and were also missing for the period 2008-2011 due to changes of the instrument. A conversion technique is applied in order to calculate the sunphotometer AOD~~  
5 ~~in lidar-compatible wavelengths. It is discussed in section 3.~~ Details on the instrument and the AERONET infrastructure are included in (Holben et al., 1998).

### 3 Methodology

The ~~prepossessing pre-prossessing~~ required in order to obtain the final climatological products is discussed in this section. The ~~lidar dataset includes the full dataset is applied for the calculation of the aerosol geometrical properties. The lidar dataset~~  
10 ~~applied for the calculation of the aerosol optical properties is a subset that includes the night-time~~ aerosol extinction profiles at 355nm and the ~~corresponding~~ aerosol backscatter profiles at 355nm and 532nm (section 2.1), while the sunphotometer dataset contains ~~the AOD 440nm AOD data at 440, 675, 870, and 1020nm~~ (section 2.2). ~~In order to make the lidar product comparable with the sunphotometer product, the aerosol optical depth (AOD) at 355nm is calculated both from the lidar extinction profiles and from the AOD at 440nm using the angstrom 440-675nm and extrapolating for the 355nm. The integrated backscatter~~  
15 ~~coefficients at 355nm and 532nm are also obtained from the EARLINET dataset.~~

Further processing is required in order to get some structural elements from the lidar profiles. These structural elements are often referred to as geometrical properties. In our analysis, we have calculated the boundary layer height and the first major lofted layer base, top and center of mass height. With this information the AOD within the PBL and the FT can be ~~obtained distinguished. The aerosol optical depth (AOD) at 355nm is calculated from the integration of the lidar extinction~~  
20 ~~profiles. The integrated backscatter coefficients at 355nm and 532nm are also obtained from the EARLINET dataset.~~ Finally, ~~more advanced some intensive~~ optical products that are characteristic of the aerosol type and derive from the backscatter and the extinction profiles have been calculated. This includes the extinction to backscatter ratio, often referred to as the lidar ratio, at 355nm and the backscatter-related Angstrom exponent in the spectral region 355-532nm. The ~~former depends mostly on the absorption and scattering aerosol properties, while the latter depends mainly on the aerosol size distribution. The~~ analysis  
25 covers both the profile and the columnar versions of these products.

An overview of the EARLINET dataset is provided in section ~~3-13.2~~. The pre-processing required in order to calculate the geometrical optical properties from the lidar profiles are described in sections ~~3.2 and 3.3 and 3.4~~ respectively.

#### 3.1 Sunphotometer pre-processing

~~It is necessary to make the sunphotometer optical depth compatible with the lidar optical depth at 355nm. An extrapolation~~  
30 ~~method is applied (Soni et al., 2011) in order to obtain the AOD at 355nm from the sunphotometer data. This method assumes a 2nd order polynomial relationship for the logarithm of the AOD in the spectral region 340-1020nm. The constant Angstrom approach is equivalent to a linear fit to the logarithm of the AOD, instead. The 2nd order polynomial is calculated by fitting~~

the sunphotometer AOD values at 440, 675, 870, and 1020nm in a logarithmic scale. Cases with too low AOD 440nm values, below 0.05, and cases where the polynomial is ill-fitted are excluded. The AOD 355nm is then extrapolated from the polynomial, assuming that it is also valid in the UV region. The validity of the conversion is tested with the sunphotometer AOD at 340nm for the periods when both were available. In figure 1, the extrapolated AOD at 340nm, using both the 2nd order polynomial and the linear fit methods, is compared with the measured AOD at 340nm. The 'linear' method tends to systematically produce higher extrapolated AOD, especially for the cases with high AOD. This behavior is also present in the 'polynomial' approach, but it is much less pronounced. In this case, the absolute bias is below 0.035 for 90% of the cases. The sunphotometer uncertainty is 0.02 and should be even higher for the UV (Kazadzis et al., 2016). Consequently, this conversion ensures that the error introduced by the AOD extrapolation is typically close to the sun-photometer uncertainty.

## 3.2 Dataset overview

Many techniques and methods have been developed for the lidar signal pre-processing and inversions (e.g., Klett, 1981; Fernald, 1984; Ansmann et al., 1992; Lopatin et al., 2013; Chaikovsky et al., 2016). In order to ensure qualitative and consistent data processing within the EARLINET network, algorithm intercomparison campaigns have been organized (Pappalardo et al., 2004; Böckmann et al., 2004). These campaigns aimed to establish the standard methods that can be utilized by all the stations. Additionally, some quality standards have been established, in order to make the lidar products of the different systems comparable and to be able to provide quality-assured data sets of network products (Freudenthaler et al., 2018).

Concerning the timeseries under study, two different methods of processing are applied depending on the type of measurement. During the day, the data acquisition is limited to the signals that occur from the elastic scattering of the laser beam by the air molecules and the atmospheric aerosol. The Klett-Fernald-Sasano (KFS) inversion is applied (Klett, 1981; Fernald, 1984; Sasano and Nakane, 1984) and the backscatter coefficient profiles are produced. A constant a-priori climatological value of the lidar ratio has to be assumed in this method. The resulting uncertainties are discussed in depth by Böckmann et al. (2004) and can be as high as 50% if there is no information about the actual lidar ratio.

In the night, the vibrational ~~raman~~-Raman bands of the atmospheric nitrogen at 387nm and 607nm can be recorded. In this case, the ~~raman~~-Raman inversion (Ansmann et al., 1992) is applied. It allows the calculation of both the extinction and the backscatter profiles without any assumption regarding lidar ratio. Nevertheless, a constant a-priori value of the Angstrom exponent between the elastic and the ~~raman~~-Raman wavelength has to be assumed. The ~~resulting uncertainties are included in Pappalardo et al. (2004). In our analysis, the aerosol backscatter products contain the total number of profiles regardless of the inversion method. The lidar ratio profiles derive solely from the raman nighttime measurements, while the BAE profiles from the combined backscatter products~~relative error introduced should be less than 4% (Ansmann et al., 1992). The technique described in Wandinger and Ansmann (2002) allows the calculation of the lidar system's overlap function from Raman measurements. The correction is applied individually to each Raman measurement. This is particularly important for the calculation of the extinction profiles. They are calculated using the inelastic signal height derivative (Ansmann et al., 1992). As a result, they are very sensitive to the system's overlap function.

A sample time versus height cross section of the aerosol extinction coefficient at 355nm ~~in for~~ the period 2003-2017 is presented in figure ~~1-2~~. It gives an overview of the availability of the lidar measurements. The monthly mean values are produced using every available measurement. ~~For better visualization, up to one missing month has been filled with the interpolated profile of the two adjacent ones.~~ The long gaps in the years 2008 and 2011 of the timeseries are attributed to system upgrades. Some missing months also occur, especially during winter, when the weather conditions are not favorable for lidar measurements. The aerosol load seems to be significant only below 4km in most cases. The highest extinction values are typically observed closer to the ground, as expected. This is attributed to the mixing mechanisms that take place near the surface. Elevated layers can also be observed, especially in the summer months. Geometrical features that are representative of the vertical distribution of the aerosol load can be obtained from the lidar profiles. In section ~~3.2-3.3~~ we discuss the algorithmic processes that are required in order to extract those features.

### 10 3.3 Geometrical properties

The aerosol geometrical properties carry information about the structure of lidar profiles. Examples are the boundary layer height and the boundaries of the lofted layers. They can be ~~calculated from the backscatter and extinction profiles~~obtained from any lidar profile. As a result, the full lidar dataset presented in section 2.1 has been applied for the calculations. Some lidar products, however, are more accurate to use than others. For example, the longer wavelengths typically magnify the differences in the vertical distribution of the aerosol load, resulting in layers that are easier to identify. Furthermore, the ~~raman~~-Raman inversion always results in profiles that are less structured for the extinction coefficients than the backscatter coefficients. This is the reason why we prioritize them in order to produce geometrical properties. The product with the highest potential to magnify the layer structure available is selected for each measurement. More specifically, the backscatter products are prioritized over the extinction products and the longer wavelengths over the shorter ones.

#### 20 3.3.1 Boundary layer height detection

Many methods have been proposed for the calculation of the PBL height from lidar data (e.g., Flamant et al., 1997; Menut et al., 1999; Brooks, 2003; Tomasi and Perrone, 2006; Bravo-Aranda et al., 2016). Our analysis is based on the method of Baars et al. (2008) that applies the wavelet covariance transform (WCT) to the raw lidar data in order to extract geometrical features such as the PBL height and the cloud boundaries. In our case, we want to apply this method to the database products instead. The WCT transformation has also been applied successfully in the past on other lidar products. ~~(Siomos et al., 2017)~~Siomos et al. (2017), for example, use an adaptation of the WCT method and calculate the geometrical features from the aerosol concentration profiles. The transform is provided by equation 1.

$$W(\alpha, z) = \frac{1}{\alpha} \left( \int_{z-\frac{\alpha}{2}}^z F(z') dz' - \int_z^{z+\frac{\alpha}{2}} F(z') dz' \right) \quad (1)$$

where  $F$  is the product profile which the transform is being applied to,  $W$  is the result of the transformation,  $z$  and  $z'$  is the altitude and  $\alpha$  is the dilation. A dilation of 0.4 km is used for the PBL height calculations, similar to Baars et al. (2008). Additionally, an upper limit is necessary so that the top of elevated layers is not misidentified as the PBL (Baars et al., 2008). We use an upper limit of 4.2 km to be consistent with previous studies over the area (Georgoulas et al., 2009).

The boundary layer is evolving during the day and reaches its maximum height at ~~noon~~ 12 Local Solar Time. Consequently, as far as the daytime measurements are concerned, we preferred to use only measurements performed between 10 and 13 UTC. After sunset, the boundary layer collapses fast ~~but~~ and the stable boundary layer (SBL) forms typically less than 0.5km above the ground (Garratt, 1992; Mehta et al., 2017). The mixing mechanisms are restricted within this layer during the night. Unfortunately, the SBL cannot be detected with the lidar of Thessaloniki since most of the profiles start above 0.8km. Despite that, the particles that have been transported by the turbulence during the day take more time to settle, forming the so-called residual layer. As far as the aerosols are considered, this layer height bears many similarities to the daytime boundary layer height. We are particularly interested in this nighttime layer since the aerosol extinction coefficient profiles are available only after sunset (see section ~~3.1~~ 3.2). Both for this reason and for reasons of simplification, in the next sections, we will use the terms "daytime PBL" instead of daytime boundary layer and "nighttime PBL" instead of nighttime residual layer.

The upper boundary of the daytime and nighttime PBL was identified in approximately 99% of the cases. At this point it is necessary to mention that the PBL top is difficult to discern when large transported aerosol layers arrive and mix with local particles below 2km. In those cases, the PBL height can be either completely obscured or misidentified as the transported layer's upper boundary. Baars et al. (2008) present such an example. In one of their cases, an elevated dust layer complicated the retrieval of the PBL height. Additionally, due to hardware restrictions of the lidar instruments, such as the system's overlap function (Wandinger and Ansmann, 2002), near ground values are typically not provided. As far as the system of Thessaloniki is concerned, most of the profiles begin above ~~800m~~ 0.8 km. It is indeed quite rare to find profiles starting below ~~600m~~ 0.6 km. This, however, could also result in false identification of the PBL top when it is located close to the profile's starting height. This is expected to affect more the winter months, when the PBL is expected to be lower in Thessaloniki (Georgoulas et al., 2009). On the other hand, the winter measurements correspond to less than 10% of the profiles that were used for the PBL analysis ~~and are obviously not the majority~~.

### 25 **3.3.2 Lofted layer height detection**

An adaptation of the previous method (section 3.3.1) is applied on the lofted layers. ~~In this case, the complete dataset of profiles is analyzed.~~ Since this is a climatological study and the interest is not in the fine structure that individual profiles may exhibit, we decided to identify only the first three major lofted layers. For this reason, a dilation of 0.8 km has been used. Finally, the center of mass is calculated based on equation 2 in which COM is the center of mass,  $z$  is the altitude,  $F$  is the profile

30 product that is used in order to obtain the geometrical properties, while  $z_b$  and  $z_t$  are the layer's lower and upper boundaries respectively.

$$COM = \frac{\int_{z_b}^{z_t} z \cdot F(z) \cdot dz}{\int_{z_b}^{z_t} F(z) \cdot dz} \quad (2)$$

The first major layer was present in 52.48% of the profiles, while only 8.56% exhibited a second layer and much less a third layer. This is not surprising considering the large dilation value. A climatological analysis requires a sufficient number of data. This is the reason why we decided to exclude the second and third major layers from the analysis.

5 The results are presented in section 4.1. In section 3.3.4, the processes that took place in order to obtain additional optical products from the ones already available are discussed.

### 3.4 Optical properties

~~The aerosol extinction coefficient~~ A subset of the full lidar dataset was utilized for the analysis of the aerosol optical properties, which includes the night-time aerosol extinction profiles at 355nm and the aerosol backscatter coefficient night-time aerosol backscatter profiles at 355nm (Raman inversion) and 532nm ~~, are already included in the original dataset~~ (Klett inversion). We excluded the daytime backscatter profiles in order to be consistent with the extinction climatology, since the extinction profiles are only available during night-time. The lidar ratio (LR, equation 3) at 355nm and the backscatter related angstrom Angstrom exponent (BAE, equation 4) at the spectral range 355-532nm can be calculated using these from the initial products. ~~Both of them~~ The lidar ratio is produced solely from Raman profiles whereas the BAE 355-532nm is calculated both from Raman profiles, at 355nm, and from Klett profiles, at 532nm (see section 3.2). Both of these intensive properties are widely used because they are independent of the aerosol concentration thus carrying information about the aerosol type and size. The respective formulas are provided in equations 3 and 4, where  $\lambda$  is the wavelength,  $z$  is the height,  $a$  is the aerosol extinction coefficient, and  $b$  is the aerosol backscatter coefficient.

$$LR(\lambda, z) = \frac{a(\lambda, z)}{b(\lambda, z)} \quad (3)$$

$$20 \quad BAE_{\lambda_1-\lambda_2}(z) = -\frac{\ln\left(\frac{b(\lambda_2, z)}{b(\lambda_1, z)}\right)}{\ln\left(\frac{\lambda_2}{\lambda_1}\right)} \quad (4)$$

Furthermore, some columnar products can be easily obtained from the profiles. The AOD and the mean columnar extinction at 355nm, as well as the integrated backscatter (INTB) and the mean columnar backscatter at 355nm and 532nm are calculated using the original dataset first. Then, the columnar lidar ratio at 355nm and the BAE at 355-532nm are produced from the mean extinction and backscatter values. Finally, the PBL top height (see section 3.2.3) is used in order to separate the boundary layer and the free troposphere. After this, the aforementioned columnar products can also be separately calculated inside these two atmospheric regions.

### 3.5 Data filtering and averaging

Since this study is focused on climatological cycles and trends, the occurrence of random rare events that greatly deviate from the standard behavior within a given time range can negatively affect the analysis affect the representability of the monthly and seasonal averages. Consequently, a filter that excludes these such extreme events is applied on all optical products. We preferred a boxplot-based approach. For each product population, the upper and lower quantiles are produced for each month. Values that exceed the upper and lower quantiles more than 1.5 times the interquantile range are excluded sequentially, one at a time, until there are no more outliers. Given, for instance, a normally distributed population, this filter would apply to the values that exceed approximately  $\pm 2.7 \sigma$ , which corresponds to 99.3 0.7 % of the values. This applies to all the products described in sections 3.2 and 3.3. The original and 3.4. The backscatter and extinction profiles are filtered out based on their columnar versions, that is, the total AOD and the total integrated backscatter respectively. The filtering is applied once to the initial lidar dataset to avoid including extreme events in the daily averages calculations. Then, it is applied once again to the daily averages of both the lidar and the sunphotometer datasets. Ultimately, the purpose of this process is to eliminate the effect of the extremes in the monthly and seasonal averaging.

In order to calculate the monthly and seasonal (DJF, MAM, JJA, SON) mean values from the filtered products, the daily means are calculated first. Then the monthly means for each year are calculated by averaging the daily means and the seasonal means are produced by averaging the monthly mean values. For the EARLINET dataset, every available measurement night-time extinction profile at 355nm and every night-time backscatter profile at 355nm and 532nm (section 3.4) is used. The For the AERONET dataset, however, is the reference dataset in this study. For this reason, a limit of at least 10 daily mean values per month and at least 2 out of 3 monthly values per season was set in order to ensure that the averages are representative enough. We have to clarify here that the aim of this study is not to make a point-by-point comparison of the two datasets but to compare two independently estimated climatologies. In all cases, a limit of at least 5 years of monthly or seasonal averages per annual value is set for the annual cycles and seasonal profiles. This limit is empirical. Its purpose is to increase the representativity of the annual cycle without missing losing too many data points. Missing months or missing parts of the profile in figures 3 and 4 and 5, occur from this particular filter.

## 4 Results and discussion

The results of the climatological analysis of the optical and geometrical aerosol properties in Thessaloniki are presented in this section. The layer analysis of section 3.2-3.3 is displayed and discussed in section 4.1, while sections 4.2 and 4.3 include respectively information on the seasonal response of all the columnar and profile products under study respectively. Finally, the long-term trends of the two AOD databases are presented and compared discussed in section 4.4.

### 4.1 Layer analysis

In this section the distribution distributions of the layer features is are examined. Figure 2-3 on the left contains the results displayed in histograms for the daytime and nighttime PBL top height, while table 1 contains some metrics of the distributions. As it was mention in section 3.2 mentioned in section 3.3.1, the daytime PBL corresponds to the available measurements

between 10 UTC and 13 UTC, while the nighttime PBL corresponds to all the available measurements after sunset. The  
 30 daytime boundary layer and night-time residual layer top is identified in 99% of the observations. The two distributions are  
 similar with median values around 1.2 km. According to table 1, the median difference is quite small, less than 0.1 km. As  
mentioned in section 3.3.1, the SBL is undetectable with the lidar system since it is so close to the ground. There is a peak at  
 1.1 km which is more pronounced for the nighttime PBL distribution. ~~This peak results to a small shift to the distribution's~~  
~~median value towards higher values. According to table 1, it is less than 0.1.~~ Furthermore, the majority (more than 50%) of  
 the cases exhibit ~~an upper boundary that is between 0.99 and 1.68~~ PBL values between 0.9 and 1.8 km. It is importation to  
 mention that ~~these percentages could be underestimated in the cases that the real pbl~~ the PBL top could be misidentified when  
 5 the real PBL top is located below 0.8 km because, as ~~it was~~ mentioned in section ~~3.1, most profiles contain values only~~ 3.3.1,  
the starting height of the profiles is typically above that height. This should mainly affect the winter measurements when the  
~~pbl~~ PBL top is expected to appear closer to the ground. ~~A maximum appears in both distributions at 1.1 km.~~

The results regarding the lofted layer are presented in figure ~~2-3~~ on the right. The upper and lower boundary as well as the  
 center of mass distributions are displayed in histograms. All three of them are flatter than the PBL distribution, as the frequency  
 10 never exceeds 15% in any height class. The maximum values appear at 1.7 km, ~~2.2~~ 2.1 km, and 3.1 km and the median at ~~2.04~~  
~~km, 2.59, and 3.24~~ 1.86 km, 2.49, and 3.14 for the base, center of mass, and top respectively. The layer thickness ranges  
 between ~~0.63 km and 1.59~~ 0.69 km and 1.47 km for 50% of the cases. More information on the distributions is included in  
 table 1. As stated in section 3.3.2, the lofted layer was present in 48% of the profiles. The seasonal analysis of the geometrical  
 parameters displayed here is presented in section 4.2 ~~in which the discussion of the seasonal behavior of multiple aerosol~~  
 15 ~~properties takes place~~ along with the various retrievals from lidar data.

## 4.2 Seasonal cycles - Columnar Products

In this section the optical and geometrical properties are analyzed in order to detect seasonalities in their annual cycle. The  
extrapolated AOD at 355nm ~~and the angstrom at 440-675nm~~ from the AERONET dataset ~~are also included as reference data is~~  
also included. The results of the columnar optical products and the geometrical products are displayed in monthly boxplots  
 20 (figure ~~3~~) ~~. This is not possible for 4~~ while the results of the profile optical products ~~due to the large volume of information that~~  
~~the vertical distribution carries. Consequently, these results~~ are exhibited in the form of seasonal average profiles (see section  
 4.3). The boxplots are constructed using the monthly average population ~~and not the initial or daily value populations.~~ This is  
 the reason why some outliers occur in figure ~~3-4~~ despite the application of the filtering process which has been applied to the  
 initial and daily averages per month mentioned in section ~~3.4~~ 3.5. The annual monthly averages are also included in figure ~~3-4~~  
 25 (dots).

### 4.2.1 Aerosol Optical Depth

The results from the AOD 355nm analysis are displayed in figure ~~3a-4a~~ and 3b. The AERONET dataset shows an annual cycle  
 with the maximum annual mean values around 0.5 for July and August and the minimum values close to 0.25 in the winter  
 months (figure ~~3a-4a~~). A small secondary maximum appears at 0.4 in April. The EARLINET dataset shows a consistent annual



cycle ~~if compared to~~ with the AERONET dataset. The ~~lidar values, however,~~ annual mean lidar AOD values range from 0.2 in January to 0.65 in August. Higher lidar values are clearly observed during summer. Furthermore, the lidar values are more broadly distributed. They exhibiting always longer interquantile ranges, especially in April and the summer months. This probably occurs because the lidar sampling rate is much more sparse than the sunphotometer sampling rate. February and December are not included as the cloudy weather conditions in the winter ~~probably resulted in lower~~ resulted in lidar data availability which does not fulfill the criteria mentioned in section 3.5. Apart from cloudy conditions, due to hardware limitations, it is not possible for the lidar system to operate during days with strong winds. This is not the case for the sunphotometer and, therefore, it could affect the results. For example, the AOD overestimation by approximately 0.1 of the lidar dataset during the summer months could be explained if days with strong winds in the summer are connected with lower aerosol load. ~~This, however, needs to be further investigated. The annual mean values range from 0.2 in January to 0.65 in August for the EARLINET dataset which is in accordance with the reference data~~ Another probable explanation involves the uncertainties introduced due to the system's overlap in combination with the use of night-time lidar measurements and daytime sunphotometer measurements. A systematic seasonal bias has been detected when isolating common sunphotometer and lidar cases and is discussed in section 4.5.1. It equals 0.13 during summer, corresponding to higher lidar AOD, and -0.15 during winter, corresponding to lower lidar AOD. Consequently, the summer and winter AOD differences observed in figure 4a could be attributed to such issues.

The AOD cycle in the PBL and in the FT is presented in figure ~~3b~~ 4b. The contribution from the free troposphere seems to be comparable and even higher than the PBL contribution during April and the summer months. This is probably attributed to transported ~~biomass burning aerosol~~ aerosols during summer and spring in the FT (see section 4.2.2.4). The other months, especially March, exhibit a lower FT contribution.

#### 4.2.2 Integrated Backscatter

~~Another columnar optical product, the integrated backscatter (INTB) at 355nm and at 532nm, is presented in figure 3e and 3d. The AERONET equivalent is calculated by dividing the AOD at 355nm and at 532nm with a constant lidar ratio of 50 and it is also included in the figures. The pattern here is more or less compatible with the AOD results. The highest mean values, close to 0.008 and 0.005 appear in July and August for the INTB at 355nm and in July for the INTB at 532nm respectively. Additionally, a second maximum, also around 0.005, appears in May for the INTB at 532nm. The minimum mean values, around 0.002 and 0.0015, appear in February and December for 355nm and 532nm respectively.~~

#### 4.2.2 Lidar ratio and Backscatter related Angstrom

As far as the lidar ratio at 355nm and the BAE at 355-532nm is concerned, ~~it exhibits~~ they exhibit more complicated patterns, ranging from 45 to 70 sr and 1.0 to 2.0 respectively. The lidar ratio shows two peaks, one in the summer months and another one in November that probably extends to January (figure 4c). Unfortunately, this is not so clear since February and December are not included. The minimum values ~~, that suggest less absorbing particles,~~ occur in the spring months ~~, in September, and October and in the early autumn months.~~ The BAE cycle, on the other hand ~~, has three peaks, in December, April, and July is~~ relatively stable, fluctuating between 1.1 and 1.5 for most months. The minimum values, that indicate larger particles, appear

30 in May. ~~The AERONET angstrom at 440-675nm is also included. The two annual cycles seem consistent and the three peak pattern is present here as well. The spring peak, however, appears in March instead of April. The cycle range is also small, from 1 to 1.5. As these two products at 0.9, while the maximum values, that indicate smaller particles, appear in January at 1.9. Since both the lidar ratio and the BAE~~ depend mainly on the aerosol type and size and not on the concentration, their variability ~~from the average~~ should be more ~~affected by~~ sensitive to transported aerosol events ~~than the optical integrals (AOD and INTB) are~~. For example, the higher lidar ratio and BAE values observed in the summer months ~~and April~~ are indicative of mixing with biomass burning layers. On the other hand, smaller BAE values accompanied by smaller lidar ratio values could be the result of ~~mixing with either marine or dust particles~~ a stronger sea salt or dust component. The optical properties of the

5 cases that are affected by layers of transported aerosol ~~layers~~ and their climatological behavior are presented and discussed in section 4.3.

### 4.2.3 Boundary Layer and First Lofted Layer

The PBL height and the lofted layer center of mass cycles are presented in ~~3g and 3h~~ 3e and 3f respectively. Looking at the PBL height, the maximum mean values, around 1.5 km, appear ~~in May, July, August, and from May to~~ September. The minimum

10 values, close to 1.1 km occur in March and December. In general, the PBL seems to be higher in the warm months (May to September) and lower in the cold months (November to March), as expected (Georgoulias et al., 2009), with the exception of January. This could be attributed to the difficulties that the lidar system faces below 800m that were discussed in sections ~~3.2 and 4.1, especially if the values in January and February were supposed to be even lower than March and December~~ 2.2 and 3.3.1. Additionally, it was mentioned above that the lidar system usually operates under ~~sunny weather~~ cloud free conditions.

15 In winter, this could result in a sampling that favors the presence of high pressure systems and consequently higher PBL top height values. The missing point in February just makes it more difficult to draw any firm conclusions on this. The lofted layer is higher from February to September with two peaks at May and August, probably due to dust and biomass burning layers that arrive in the FT. The lowest values appear in January and December.

### 4.3 Seasonal Cycles - Profile products

20 In this section, the seasonal profiles of the extinction coefficient at 355nm, the ~~backscatter coefficient at 355nm and 532nm, the~~ lidar ratio at 355nm, and the BAE at 355-532nm are discussed. The results are presented in figure ~~4.5~~ and in tables 2, 3 and 4. The seasonality of each product is also analyzed in the boundary layer and the free troposphere per mixture type. These results are presented in tables. Four categories are included. The category "all" corresponds to the whole dataset for the optical properties (see section 3.4). The categories "dust mixtures" and "fire biomass mixtures" correspond to the cases that contain at

25 least one transported Saharan dust ~~and biomass burning events respectively, while the or biomass burning layer respectively~~. The category "continental" or "cont" contains all the ~~cases that were marked neither as "dust" nor as "fire"~~ rest of the cases. This can include mixtures of local soil dust, urban, agricultural or maritime aerosol. The characterization of the dust and biomass burning measurements is already available in the EARLINET database, since it is performed manually per station before the measurements are uploaded. The process includes a back-trajectory analysis from the Hybrid Single Particle Lagrangian

30 Integrated Trajectory Model HYSPLIT per layer. The biomass burning activity along the trajectory path is examined using fire pixel data from the MODIS Terra and Aqua Global Monthly Fire Location Product (MCD14ML). The presence of dust particles for trajectories passing over the Sahara desert is cross-checked using model simulations from the Dust Regional Atmospheric Model (BSC-DREAM8b). Even one transported layer in a profile is enough to flag the measurement. Consequently, the "dust mixtures" and "firesbiomass mixtures" profiles are seldom pure. They are expected to be mixed with continental aerosol, especially near the ground where the local particles are more dominant. Another type of special event that is available in the database is the volcanic category. For Thessaloniki, this mainly includes some cases of transported volcanic ash during April and May 2010 when the Eyjafjallajökull volcano erupted in Iceland. ~~These measurements~~ (Pappalardo et al., 2013). These

5 volcanic cases have not been included in ~~the analysis a separate mixture category~~ since this type of ~~partieles aerosol mixture~~ is too rare.

#### 4.3.1 ~~Category "All "~~cases

The aerosol extinction coefficient at 355nm is maximum in summer and minimum in winter (~~figures 4.figure 5.i.a~~) for the category "all". The AOD at 355nm reaches ~~0.29-0.30 both~~ in the PBL and ~~0.30~~ in the FT during summer (table ~~32~~). In winter, those values decrease to ~~0.13 and 0.09 for the same atmospheric regions. A similar behavior can be observed for the backscatter coefficient profiles (figures 4.i.b, figures 4.i.c) above 1.5 km. The autumn backscatter profiles, however, show increased values below 1.5km that reach and even surpass the summer ones, especially for 532nm~~ 0.14 and 0.08 respectively. The lidar ratio ranges mostly between ~~48 to 64~~ 49 to 61 sr (table ~~43~~) for this category. The minimum values ~~of 48 and 50, which correspond to the less absorbing particles,~~ appear during spring ~~in the PBL and in the FT, respectively~~ and the maximum during summer.

15 The BAE, on the other hand, ranges mostly from ~~1.1-1.0~~ to 1.7 and the biggest particles tend to appear during autumn and spring in the PBL, while the smallest ones during winter in ~~the FT (table 5)~~ both atmospheric regions (table 4).

#### 4.3.2 ~~Category "Continental"~~

When the dust and biomass burning episodes are excluded ("cont" category), the extinction profile of spring decreases down to the winter levels (figure ~~4.5.ii.a~~). The spring AOD drops from ~~0.21 and 0.15~~ 0.20 and 0.16 to 0.12 and 0.11 in the PBL and in the FT respectively (table 3). The other seasons are not affected as much. The lidar ratio ranges from ~~45 to 62~~ 47 to 61 sr (table 4). Giannakaki et al. (2010) report an annual mean value of  $56 \pm 23$  sr for the continental polluted particles in Thessaloniki during the period 2001-2007. This comparison, however, is not completely straightforward for the continental particles, since in their study they divide them in three subcategories (local, continental polluted, and continental west/northwest) based on the wind direction. This is not performed here. The minimum values at ~~45~~ 46 sr appear in spring. This could be attributed to

25 mixing with maritime aerosol. It is within the range that Burton et al. (2012) report for polluted maritime particles. The other ~~values seasons~~ are within the range that Burton et al. (2012) report for urban particles. Autumn ~~exhibits~~ and winter exhibit the highest variability. The BAE values range ~~mostly between 1.4 and 1.5~~ between 1.7 and 1.9 for all seasons except autumn (table 5). The ~~highest value of 1.9 is observed during winter in the FT and the minimum value of 1.1~~ minimum values are observed at 0.9 during autumn in the PBL. According to Heese et al. (2017) lower ~~angstrom~~ Angstrom values are more typical of pollution

mixtures rather than of pure pollution. Giannakaki et al. (2010) report an annual mean value of  $1.4 \pm 1.0$  for the continental polluted aerosol.

#### 4.3.3 ~~Category "Dust "~~mixtures

As far as the "dust mixtures" group is concerned, the maximum values in the extinction profiles at 355nm appear in summer above 1.5 km ~~and in autumn below 1.5 km (figure 4. High values also appear in autumn in the near range (figure 5.iii.a).~~ The AOD values range from 0.17 to 0.32 ~~and they are slightly higher in the PBL than in the FT (table 3). According to the backscatter profiles at 355nm the minimum values should probably appear in winter (figure 4.iii.b, figure 4.iii.c 0.31 (table 2).~~ Unfortunately, the winter extinction profile is missing, since the dust cases are rare during this season in Thessaloniki. The autumn data availability is also marginal. The lidar ratio at 355nm ranges from 47 to ~~58-61~~ sr (table 3). Giannakaki et al. (2010) report an annual value of  $52 \pm 18$  sr. The minimum values occur ~~once again in spring at 47 and 48 during spring, and during autumn~~ in the PBL ~~and in the FT respectively, ranging between from 45 to 48~~ sr. These values are typical of dust and marine mixtures (Groß et al., 2015; Mona et al., 2006). The ~~autumn values are also similar. The~~ summer values at ~~56 and 58 60 and 61~~ sr in the PBL and in the FT respectively seem closer to the expected values for transported dust (Groß et al., 2015). It is possible that the wind circulation is responsible for this behavior. Due to a high pressure system over the Balkans that occurs typically from May to September (Tyrlis and Lelieveld, 2013), it is more difficult for the dust layers to be transported directly from Northwestern Africa to Thessaloniki through southwest winds that pass over the Mediterranean. Consequently, the dust particles are forced to travel a longer path, through central Europe in order to reach Thessaloniki (Israelevich et al., 2012). This behavior could result in the different mean lidar ratios between spring summer and the other two seasons. The BAE ranges mostly between ~~0.8 and 1.0 (table 50.9 and 1.2 (table 4)~~, values that are typical of dust mixture (Papayannis et al., 2009; Baars et al., 2016). ~~During winter, a sharp minimum of -0.3 occurs in the PBL. The data availability, however, for winter in the "dust" category is marginal as the dust cases are rare during winter. Probably, only the strong, and consequently more pure, dust events manage to reach Thessaloniki in the winter months but this requires further investigation in the wind seasonal circulation patterns. Marinou et al. (2017) show that the dust component during the transported dust episodes in winter (JFM) is usually located below 2km for Thessaloniki.~~ Giannakaki et al. (2010) report an annual BAE value of  $1.5 \pm 1.0$  sr for this category. A summer BAE of ~~1.5-1.6~~ in the PBL versus ~~0.7-1.2~~ in the FT indicates that, in the PBL, the particles are either quite mixed or absent, ~~while in.~~ In the FT the dust component can still be considered dominant, since the BAE is shifted towards values closer to the transported dust angstrom-Angstrom of  $0.5 \pm 0.5$  reported within EARLINET (Müller et al., 2007). Indeed, Marinou et al. (2017) show that the dust component during the transportation episodes over Greece in summer (JAS) is more dominant above 2km during summer which is consistent with our findings.

#### 30 4.3.4 ~~Category "Fires"~~Biomass burning mixtures

The ~~"fires "~~category exhibits main source of biomass burning aerosol for Thessaloniki is agricultural fires in the Balkans, Belarus and European Russia that typically begin after March and end in October (McCarty et al., 2017; Amiridis et al., 2009). These mixtures exhibit vertical distributions with maximum values during summer ~~above 1.0. Below that altitude, the maximum~~

values are observed in the autumn profile. Below 1km, the spring and autumn profiles are quite similar. The AOD 355nm generally ranges from 0.18 to 0.24 with the exception of summer in the FT where the largest AOD value of table 3 occurs at 0.37. Consequently, 0.39. It is possible that the strong biomass burning events tend to occur during summer and the smoke aerosols are usually transported at higher altitudes. The low AOD variance (0.06) shows that this situation is common for summer. Winter is Winter is entirely missing here as well, even for the backscatter profiles, since it is rare for the wildfires to occur due to the unfavorable weather conditions. Wildfires in the Balkans typically begin after June. In spring and late autumn, however, the biomass burning should be almost entirely anthropogenic, caused by agricultural activities (McCarty et al., 2017) since the weather conditions are unfavorable for fires. The lidar ratio ranges from 52–51 to 73 sr. The highest values at 73 and 72, above 70 sr appear during summer in the PBL and in the FT respectively. The while the minimum lidar ratio at 52 and a low BAE of 1.2 are is observed in the PBL during spring. Both of those values are closer to the continental ones. It is close to the respective continental lidar ratio and also within the range that Heese et al. (2017) report for pollution particles. Consequently, it is quite possible that the biomass layers affect less, if not at all, the boundary layer during spring. In all other cases, the lidar ratio is similar, ranging from 61 to 63–59 to 61 sr. This Differences with the summer levels could be attributed to the different smoke type (agricultural fires) mentioned during spring and autumn. Additionally, it could also be the result of different different aerosol transportation paths and thus either more mixing with continental particles or different aging of smoke (Papayannis et al., 2014; Nicolae et al., 2013). For example, Groß et al. (2013) report a lidar ratio value of  $63 \pm 7$  for African fires against  $69 \pm 17$  for Canadian fires (e.g., Amiridis et al., 2009; Nicolae et al., 2013; Papayannis et al., 2014). The BAE values appear quite stable and range are available only for summer and autumn, ranging from 1.3 to 1.5 excluding the spring values in the PBL 1.4. Giannakaki et al. (2010) report an annual mean lidar ratio of  $69 \pm 17$  sr and a mean BAE of  $1.7 \pm 0.7$  for this category which seems consistent with our results.

#### 4.4 Long-term changes

The AOD at 355nm is selected for the timeseries analysis, since it is the product with the longest data span for both the EARLINET and the AERONET datasets. The two timeseries are compared in figure 5a of seasonal averages are shown in figure 6a. The lidar AOD values cover a larger range and show higher variability than the sunphotometer values. This is expected given the much lower data availability in this dataset. This is also the reason why the presentation of seasonal averages is preferred here. We intend to compare the two timeseries in terms of trends and not point by point. The linear fit slope values seem consistent for the two timeseries. The EARLINET dataset results in a decrease of the AOD by 0.0097–0.0109 per year while the sunphotometer dataset in a decrease of 0.0061–0.0075 per year. This translates to a decrease per decade of 21.4% versus 14.3–29.0% versus 20.7% respectively compared to the theoretical AOD value of 2003 per set. AOD levels in 2003. In order to calculate the long-term trend during the period 2003–2017 the seasonality must be removed from the timeseries. This is performed by subtracting the respective seasonal annual cycle from each year for both datasets. The resulting values are the seasonal AOD anomalies. These timeseries are presented in figure 5b6b. The least square fit slope here represents the dataset trend. The new values are -0.0094 (21.0–0.0088 (23.2%) and -0.0073 (16.6–0.0081 (22.3%) in the period 2003–2017 for the EARLINET and the AERONET datasets respectively. (Fountoulakis et al., 2016) report a negative AOD 320nm trend of

-0.009 per year for Thessaloniki during the period 1994-2014, a result that seems consistent with our findings. We have applied a Mann-Kendal non-parametric test in order to ensure the existence of these trends (Hirsch et al., 1982; Gilbert, 1987). ~~The resulting p-values are 0.0282 and 0.0002 for the lidar and the sunphotometer trends respectively, both of them less than 0.05 that signifies statistical significance. Both of them are statistically significant~~ at the 95% confidence interval. We further investigate this decreasing trend by looking at the AOD timeseries in the PBL and in the FT that are available for the EARLINET dataset. The two products are directly compared in figure ~~5e-6c~~ and their seasonal anomalies are presented in figure ~~5d6d~~. It appears that the free tropospheric AOD ~~doesn't change significantly during the period 2003-2017. It~~ slightly increases by ~~0.0012 per year. This 0.0016 per year, however this~~ trend is not statistically significant ~~with a p-value of 0.42 at the 95 % confidence interval~~. The PBL AOD, on the other hand, shows a decreasing statistically significant trend of ~~-0.0105 per year with a p-value of 0.0045-0.0104 per year~~. Consequently, the decrease of the total AOD seems to ~~be mainly attributed to a decrease occur mainly~~ in the lower atmospheric layers, inside the PBL. This could be attributed to a reduction of the aerosol load coming from local sources. A change in the aerosol type, such as a shift to less absorptive particles in the PBL could also be responsible for this behavior ([Fountoulakis et al., 2016](#)). Further research on the aerosol microphysical properties could contribute to gain insight into this matter.

#### 15 4.5 Factors affecting the compatibility of the two climatologies

In this section, we present some diagnostic tests that have been performed in order to ensure that the two climatologies can be safely compared despite the different sampling and the non-simultaneous acquisition of measurements. In section 4.5.1, periodical systematic biases that could affect the annual cycles are discussed. Non-periodical biases that could interfere with the long-term trends are addressed in section 4.5.2. Finally, section 4.5.3 includes an analysis of issues that arise due to the different sampling rate between the lidar and the sunphotometer.

#### 20 4.6 Seasonal systematic biases

Since the sunphotometer measurements are performed during the day and the lidar Raman measurements during the night, a systematic bias could be introduced due to daily cycles of emission and meteorology. Additionally, the lidar profiles seldom extend below 600m. This could also contribute to a systematic bias. This bias is expected to produce an offset and/or seasonal discrepancies between the two datasets. In order to investigate the aforementioned issues the common daily averages between the two datasets are isolated in order to ensure that only the overlap issues and the day/night discrepancies would contribute to the bias. We have computed the AOD at 355nm biases by subtracting the sunphotometer daily mean AOD from the lidar daily mean AOD per case. The seasonal biases and the total bias are calculated with a methodology similar to the one applied to the lidar measurements (see section 3.5). The daily means are calculated first. Then the monthly means for each year are calculated by averaging the daily means and the seasonal means are produced by averaging the monthly mean values. Spring and autumn biases are close to zero with values at 0.03 and -0.01 respectively. The winter seasonal bias is -0.15 while the summer bias is 0.13. The total bias is close to zero, at -0.003. Consequently, there is a minor offset towards slightly lower lidar AOD values

between the two annual cycles and a systematic estimation of higher lidar AOD values in summer and lower lidar AOD values in winter. This behavior is already visible in the monthly annual cycles (figure 4), especially for summer.

#### 4.7 Non-periodical systematic biases

As far as the long term trend analysis is concerned, even if the sunphotometer and the lidar AOD exhibit different seasonal patterns, the trend values should not be much affected since the seasonality has been removed from each timeseries individually (see section 4.4). Furthermore, an artificial trend could also be introduced to the lidar timeseries if the bias is non-periodically time-dependent. Changes in the system's full overlap height (see section 2.2) within the timeseries could produce such an effect. We examine such effects by calculating the trend of the seasonal bias after removing the bias seasonality. The deseasonalized bias exhibits a negative trend of 0.0022 per year, however, it is not significant. As a result, the long term trend of the lidar AOD is not significantly affected by systematic biases.

#### 4.8 Sampling

Another issue that needs to be addressed is that the sparse EARLINET sampling could result to averages that are not representative and comparable to the AERONET ones. This would significantly affect the annual cycle and trends. We limited the AERONET dataset to only Monday and Thursday measurements to be compatible with the EARLINET schedule of night-time measurements. The resulting significant trend is -0.0090 per year, very close to -0.0085 that occurs when using the whole dataset (figure 7). The annual cycle seems stable with absolute differences smaller than 0.08 for every monthly average. To be on the safe side, we obtained the sunphotometer trend using only the daily means where both a sunphotometer and a lidar measurement were available. The resulting significant trend is -0.0089 per year (figure 7), still close to -0.0085 that occurs when using the whole dataset. Consequently, the lidar averages should be statistically meaningful and the uncertainty in the EARLINET trend should be less than  $\pm 0.0005$  due to the limited sampling. Probably the length of the timeseries (14 years) compensates the sparse sampling rate. In the future, we plan to further analyze how the sampling and the timeseries length affect the climatological products produced from the columnar aerosol optical properties.

### 5 Conclusions

The analysis resulted in consistent, statistically significant, and decreasing seasonal AOD 355nm trends of ~~-21.0% and -16.6%~~ -23.2% and -22.3% per decade in the period 2003-2017 over Thessaloniki for the EARLINET and the AERONET datasets respectively. This implies that the EARLINET schedule of data acquisition can be quite effective in producing data that can be applied to climatological studies. Furthermore, the decreasing trend observed is mainly attributed to changes in the aerosol properties inside the boundary layer. The free tropospheric AOD, on the other hand, does not change much in the period under study and this change is also not statistically significant. This behavior could be attributed to either changes in the local emissions or in the aerosol type inside the PBL. Further investigation is required on this, however. Concerning the seasonal ~~eyeles~~ profiles of the period ~~2013-2017, the higher~~ 2003-2017, the highest values of the extinction at 355nm appear during summer while the



lower~~lowest~~ ones appear during winter. ~~If the special events are excluded, the spring extinction profile is mostly affected. It decreases to the winter levels and probably corresponds to maritime and urban aerosol mixtures. The other seasons exhibit values typical of urban pollution particles.~~ The mean lidar ratio ranges between 47 sr and 61 sr for the continental particles. Mixing with Saharan dust and biomass burning aerosol is rare during winter. The dust component is ~~much~~ more dominant in the FT than in the PBL during summer. ~~The opposite is observed during winter.~~ This behavior is supported by other studies. In spring and autumn, ~~mixing with marine particles probably takes place. The strongest biomass burning episodes~~ the lidar ratio is approximately 47 sr which is more typical of dust and marine mixtures. Concerning the biomass burning cases, the transported layers tend to arrive ~~during summer~~ in the FT ~~and are probably attributed to wildfires. Lower mean lidar ratio values during spring and summer.~~ Lidar ratio values close to 60 sr are observed during autumn and during spring in the free troposphere. It increases to approximately 72 sr in summer, which could be the result ~~either of the fire type switching from natural to anthropogenic or~~ of different smoke aging caused by different wind circulation paths. Such seasonal profiles of the most dominant aerosol types can be quite useful for applications that require a priori aerosol profiles, for example, they can be utilized in models that require an aerosol climatology as input, in the development of algorithms for satellite products, and in passive remote sensing techniques that require the information of the aerosol vertical distribution. Future studies that focus on the climatological circulation patterns of the air masses that arrive in Thessaloniki will reveal more information on the seasonal variations of the aerosol properties that are observed and discussed here.

#### *Data availability.*

The lidar data used in this study are available upon registration at <http://data.earlinet.org>. The AERONET sunphotometer data for Thessaloniki are publicly available at <https://aeronet.gsfc.nasa.gov/>.

#### *Competing interests.*

The authors declare that they have no conflict of interest.

*Acknowledgements.* This work has been conducted in the framework of EARLINET (EVR1 CT1999-40003), EARLINET-ASOS (RICA-025991) ACTRIS and ACTRIS-2 funded by the European Commission. The research leading to these results has received funding from the European Union's Horizon 2020 research and innovation programme under grant agreement No 654109 and previously from the European Union Seventh Framework Programme (FP7/2007-2013) under grant agreement No 262254. Elina Giannakaki acknowledges the support of the Academy of Finland (project no. 270108). Kalliopi A. Voudouri acknowledges the support of the General Secretariat for Research and Technology (GSRT) and the Hellenic Foundation for Research and Innovation (HFRI). Konstantinos Fragkos would like to acknowledge the support from European Union's Horizon 2020 Research and Innovation Programme, under Grant Agreement no 692014 - ECARS. This research has been co-financed, via a programme of State Scholarships Foundation (IKY), by the European Union (European Social Fund

- ESF) and Greek national funds through the action entitled "Scholarships programme for postgraduates studies - 2nd Study Cycle" in the framework of the Operational Programme "Human Resources Development Program, Education and Lifelong Learning" of the National Strategic Reference Framework (NSRF) 2014 – 2020.

## References

- Amiridis, V., Balis, D. S., Kazadzis, S., Bais, A., Giannakaki, E., Papayannis, A., and Zerefos, C.: Four-year aerosol observations with a Raman lidar at Thessaloniki, Greece, in the framework of European Aerosol Research Lidar Network (EARLINET), *Journal of Geophysical Research: Atmospheres*, 110, <https://doi.org/10.1029/2005JD006190>, d21203, 2005.
- Amiridis, V., Balis, D. S., Giannakaki, E., Stohl, A., Kazadzis, S., Koukouli, M. E., and Zanis, P.: Optical characteristics of biomass burning aerosols over Southeastern Europe determined from UV-Raman lidar measurements, *Atmospheric Chemistry and Physics*, 9, 2431–2440, <https://doi.org/10.5194/acp-9-2431-2009>, 2009.
- Ansmann, A., Wandinger, U., Riebesell, M., Weitkamp, C., and Michaelis, W.: Independent measurement of extinction and backscatter profiles in cirrus clouds by using a combined Raman elastic-backscatter lidar, *Appl. Opt.*, 31, 7113–7131, <https://doi.org/10.1364/AO.31.007113>, 1992.
- Baars, H., Ansmann, A., Engelmann, R., and Althausen, D.: Continuous monitoring of the boundary-layer top with lidar, *Atmospheric Chemistry and Physics*, 8, 7281–7296, <https://doi.org/10.5194/acp-8-7281-2008>, 2008.
- Baars, H., Kanitz, T., Engelmann, R., Althausen, D., Heese, B., Komppula, M., Preißler, J., Tesche, M., Ansmann, A., Wandinger, U., Lim, J.-H., Ahn, J. Y., Stachlewska, I. S., Amiridis, V., Marinou, E., Seifert, P., Hofer, J., Skupin, A., Schneider, F., Bohlmann, S., Foth, A., Bley, S., Pfüller, A., Giannakaki, E., Lihavainen, H., Viisanen, Y., Hooda, R. K., Pereira, S. N., Bortoli, D., Wagner, F., Mattis, I., Janicka, L., Markowicz, K. M., Achtert, P., Artaxo, P., Pauliquevis, T., Souza, R. A. F., Sharma, V. P., van Zyl, P. G., Beukes, J. P., Sun, J., Rohwer, E. G., Deng, R., Mamouri, R.-E., and Zamorano, F.: An overview of the first decade of Polly<sup>NET</sup>: an emerging network of automated Raman-polarization lidars for continuous aerosol profiling, *Atmospheric Chemistry and Physics*, 16, 5111–5137, <https://doi.org/10.5194/acp-16-5111-2016>, 2016.
- Balis, D., Koukouli, M.-E., Siomos, N., Dimopoulos, S., Mona, L., Pappalardo, G., Marengo, F., Clarisse, L., Ventress, L. J., Carboni, E., Grainger, R. G., Wang, P., Tilstra, G., van der A, R., Theys, N., and Zehner, C.: Validation of ash optical depth and layer height retrieved from passive satellite sensors using EARLINET and airborne lidar data: the case of the Eyjafjallajökull eruption, *Atmospheric Chemistry and Physics*, 16, 5705–5720, <https://doi.org/10.5194/acp-16-5705-2016>, 2016.
- Behnert, I., Matthias, V., and Doerffer, R.: Aerosol climatology from ground-based measurements for the southern North Sea, *Atmospheric Research*, 84, 201 – 220, <https://doi.org/https://doi.org/10.1016/j.atmosres.2006.05.006>, 2007.
- Biniotoglou, I., Basart, S., Alados-Arboledas, L., Amiridis, V., Argyrouli, A., Baars, H., Baldasano, J. M., Balis, D., Belegante, L., Bravo-Aranda, J. A., Burlizzi, P., Carrasco, V., Chaikovsky, A., Comerón, A., D’Amico, G., Filioglou, M., Granados-Muñoz, M. J., Guerrero-Rascado, J. L., Ilic, L., Kokkalis, P., Maurizi, A., Mona, L., Monti, F., Muñoz Porcar, C., Nicolae, D., Papayannis, A., Pappalardo, G., Pejanovic, G., Pereira, S. N., Perrone, M. R., Pietruczuk, A., Posyniak, M., Rocadenbosch, F., Rodríguez-Gómez, A., Sicard, M., Siomos, N., Szkop, A., Terradellas, E., Tsekeri, A., Vukovic, A., Wandinger, U., and Wagner, J.: A methodology for investigating dust model performance using synergistic EARLINET/AERONET dust concentration retrievals, *Atmospheric Measurement Techniques*, 8, 3577–3600, <https://doi.org/10.5194/amt-8-3577-2015>, 2015.
- Böckmann, C., Wandinger, U., Ansmann, A., Bösenberg, J., Amiridis, V., Boselli, A., Delaval, A., Tomasi, F. D., Frioud, M., Grigorov, I. V., Hågård, A., Horvat, M., Iarlori, M., Komguem, L., Kreipl, S., Larchevêque, G., Matthias, V., Papayannis, A., Pappalardo, G., Rocadenbosch, F., Rodrigues, J. A., Schneider, J., Shcherbakov, V., and Wiegner, M.: Aerosol lidar intercomparison in the framework of the EARLINET project. 2. Aerosol backscatter algorithms, *Appl. Opt.*, 43, 977–989, <https://doi.org/10.1364/AO.43.000977>, 2004.

- Bravo-Aranda, J. A., de Arruda-Moreira, G., Navas-Guzmán, F., Granados-Muñoz, M. J., Guerrero-Rascado, J. L., Pozo-Vázquez, D., Arbizu-Barrena, C., Olmo, F. J., Mallet, M., and Alados-Arboledas, L.: PBL height estimation based on lidar depolarisation measurements (POLARIS), *Atmospheric Chemistry and Physics Discussions*, 2016, 1–24, <https://doi.org/10.5194/acp-2016-718>, 2016.
- 5 Brenot, H., Theys, N., Clarisse, L., van Geffen, J., van Gent, J., Van Roozendaal, M., van der A, R., Hurtmans, D., Coheur, P.-F., Clerbaux, C., Valks, P., Hedelt, P., Prata, F., Rasson, O., Sievers, K., and Zehner, C.: Support to Aviation Control Service (SACS): an on-line service for near-real-time satellite monitoring of volcanic plumes, *Natural Hazards and Earth System Sciences*, 14, 1099–1123, <https://doi.org/10.5194/nhess-14-1099-2014>, 2014.
- 10 Brooks, I. M.: Finding Boundary Layer Top: Application of a Wavelet Covariance Transform to Lidar Backscatter Profiles, *Journal of Atmospheric and Oceanic Technology*, 20, 1092–1105, [https://doi.org/10.1175/1520-0426\(2003\)020<1092:FBLTAO>2.0.CO;2](https://doi.org/10.1175/1520-0426(2003)020<1092:FBLTAO>2.0.CO;2), 2003.
- Burton, S. P., Ferrare, R. A., Hostetler, C. A., Hair, J. W., Rogers, R. R., Obland, M. D., Butler, C. F., Cook, A. L., Harper, D. B., and Froyd, K. D.: Aerosol classification using airborne High Spectral Resolution Lidar measurements – methodology and examples, *Atmospheric Measurement Techniques*, 5, 73–98, <https://doi.org/10.5194/amt-5-73-2012>, 2012.
- 15 Chaikovsky, A., Dubovik, O., Holben, B., Bril, A., Goloub, P., Tanré, D., Pappalardo, G., Wandinger, U., Chaikovskaya, L., Denisov, S., Grudo, J., Lopatin, A., Karol, Y., Lapyonok, T., Amiridis, V., Ansmann, A., Apituley, A., Allados-Arboledas, L., Biniotoglou, I., Boselli, A., D’Amico, G., Freudenthaler, V., Giles, D., Granados-Muñoz, M. J., Kokkalis, P., Nicolae, D., Oshchepkov, S., Papayannis, A., Perrone, M. R., Pietruczuk, A., Rocadenbosch, F., Sicard, M., Slutsker, I., Talianu, C., De Tomasi, F., Tsekeri, A., Wagner, J., and Wang, X.: Lidar-Radiometer Inversion Code (LIRIC) for the retrieval of vertical aerosol properties from combined lidar/radiometer data: development and distribution in EARLINET, *Atmospheric Measurement Techniques*, 9, 1181–1205, <https://doi.org/10.5194/amt-9-1181-2016>, 2016.
- 20 Dubovik, O. and King, M. D.: A flexible inversion algorithm for retrieval of aerosol optical properties from Sun and sky radiance measurements, *Journal of Geophysical Research: Atmospheres*, 105, 20 673–20 696, <https://doi.org/10.1029/2000JD900282>, 2000.
- Dubovik, O., Sinyuk, A., Lapyonok, T., Holben, B. N., Mishchenko, M., Yang, P., Eck, T. F., Volten, H., Muñoz, O., Veihelmann, B., van der Zande, W. J., Leon, J.-F., Sorokin, M., and Slutsker, I.: Application of spheroid models to account for aerosol particle nonsphericity in remote sensing of desert dust, *Journal of Geophysical Research: Atmospheres*, 111, <https://doi.org/10.1029/2005JD006619>, d11208, 2006.
- 25 Fernald, F. G.: Analysis of atmospheric lidar observations: some comments, *Appl. Opt.*, 23, 652–653, <https://doi.org/10.1364/AO.23.000652>, 1984.
- Flamant, C., Pelon, J., Flamant, P. H., and Durand, P.: Lidar determination of the entrainment zone thickness at the top of the unstable marine atmospheric boundary layer, *Boundary-Layer Meteorology*, 83, 247–284, <https://doi.org/10.1023/A:1000258318944>, 1997.
- 30 Fountoulakis, I., Bais, A. F., Fragkos, K., Meleti, C., Tourpali, K., and Zempila, M. M.: Short- and long-term variability of spectral solar UV irradiance at Thessaloniki, Greece: effects of changes in aerosols, total ozone and clouds, *Atmospheric Chemistry and Physics*, 16, 2493–2505, <https://doi.org/10.5194/acp-16-2493-2016>, 2016.
- Freudenthaler, V., Linné, H., Chaikovski, A., Rabus, D., and Groß, S.: EARLINET lidar quality assurance tools, *Atmospheric Measurement Techniques Discussions*, 2018, 1–35, <https://doi.org/10.5194/amt-2017-395>, 2018.
- 35 Garratt, J.: The atmospheric boundary layer, Cambridge atmospheric and space science serie, Cambridge University Pres, Cambridge, p. 316 pp., 1992.
- Gelsomina, P., Ulla, W., Lucia, M., Anja, H., Ina, M., Aldo, A., Albert, A., Patric, S., Holger, L., Arnoud, A., Lucas, A. A., Dimitris, B., Anatoli, C., Giuseppe, D., Ferdinando, D. T., Volker, F., Elina, G., Aldo, G., Ivan, G., Marco, I., Fabio, M., Rodanthi-Elizabeth, M., Libera, N., Alexandros, P., Aleksander, P., Manuel, P., Vincenzo, R., Francesc, R., Felicita, R., Franziska, S., Nicola, S., Xuan, W., and Matthias,

- W.: EARLINET correlative measurements for CALIPSO: First intercomparison results, *Journal of Geophysical Research: Atmospheres*, 115, <https://doi.org/10.1029/2009JD012147>.
- 5 Georgoulas, A. K., Papanastasiou, D. K., Melas, D., Amiridis, V., and Alexandri, G.: Statistical analysis of boundary layer heights in a suburban environment, *Meteorology and Atmospheric Physics*, 104, 103–111, <https://doi.org/10.1007/s00703-009-0021-z>, 2009.
- Gerstl, S. A. W. and Zardecki, A.: Effects of aerosols on photosynthesis, *Nature*, 300, 436–437, <https://doi.org/10.1038/300436a0>, 1982.
- Giannakaki, E., Balis, D. S., Amiridis, V., and Zerefos, C.: Optical properties of different aerosol types: seven years of combined Raman-elastic backscatter lidar measurements in Thessaloniki, Greece, *Atmospheric Measurement Techniques*, 3, 569–578, <https://doi.org/10.5194/amt-3-569-2010>, 2010.
- 10 Gilbert, R. O.: Statistical methods for environmental pollution monitoring, Van Nostrand Reinhold, New York, NY, 1987.
- Groß, S., Esselborn, M., Weinzierl, B., Wirth, M., Fix, A., and Petzold, A.: Aerosol classification by airborne high spectral resolution lidar observations, *Atmospheric Chemistry and Physics*, 13, 2487–2505, <https://doi.org/10.5194/acp-13-2487-2013>, 2013.
- Groß, S., Freudenthaler, V., Wirth, M., and Weinzierl, B.: Towards an aerosol classification scheme for future EarthCARE lidar observations and implications for research needs, *Atmospheric Science Letters*, 16, 77–82, <https://doi.org/10.1002/asl2.524>, 2015.
- 15 Hamill, P., Giordano, M., Ward, C., Giles, D., and Holben, B.: An AERONET-based aerosol classification using the Mahalanobis distance, *Atmospheric Environment*, 140, 213 – 233, <https://doi.org/https://doi.org/10.1016/j.atmosenv.2016.06.002>, 2016.
- Heese, B., Baars, H., Bohlmann, S., Althausen, D., and Deng, R.: Continuous vertical aerosol profiling with a multi-wavelength Raman polarization lidar over the Pearl River Delta, China, *Atmospheric Chemistry and Physics*, 17, 6679–6691, [https://doi.org/10.5194/acp-17-](https://doi.org/10.5194/acp-17-6679-2017)
- 20 6679-2017, 2017.
- Herman, J., Evans, R., Cede, A., Abuhassan, N., Petropavlovskikh, I., McConville, G., Miyagawa, K., and Noiro, B.: Ozone comparison between Pandora #34, Dobson #061, OMI, and OMPS in Boulder, Colorado, for the period December 2013–December 2016, *Atmospheric Measurement Techniques*, 10, 3539–3545, <https://doi.org/10.5194/amt-10-3539-2017>, 2017.
- Hirsch, R. M., Slack, J. R., and Smith, R. A.: Techniques of trend analysis for monthly water quality data, *Water Resources Research*, 18, 107–121, <https://doi.org/10.1029/WR018i001p00107>, 1982.
- 25 Hirsikko, A., J. O'Connor, E., Komppula, M., Korhonen, K., Pfüller, A., Giannakaki, E., Wood, C., Bauer-Pfundstein, M., Poikonen, A., Karppinen, T., Lonka, H., Kurri, M., Heinonen, J., Moiseev, D., Asmi, E., Aaltonen, V., Nordbo, A., Rodriguez, E., Lihavainen, H., and Viisanen, Y.: Observing wind, aerosol particles, cloud and precipitation: Finland's new ground-based remote-sensing network, 6, 7251–7313, 2013.
- 30 Holben, B., Eck, T., Slutsker, I., Tanré, D., Buis, J., Setzer, A., Vermote, E., Reagan, J., Kaufman, Y., Nakajima, T., Lavenu, F., Jankowiak, I., and Smirnov, A.: AERONET—A Federated Instrument Network and Data Archive for Aerosol Characterization, *Remote Sensing of Environment*, 66, 1 – 16, [https://doi.org/http://dx.doi.org/10.1016/S0034-4257\(98\)00031-5](https://doi.org/http://dx.doi.org/10.1016/S0034-4257(98)00031-5), 1998.
- Hönninger, G., von Friedeburg, C., and Platt, U.: Multi axis differential optical absorption spectroscopy (MAX-DOAS), *Atmospheric Chemistry and Physics*, 4, 231–254, <https://doi.org/10.5194/acp-4-231-2004>, 2004.
- 35 Israelevich, P., Ganor, E., Alpert, P., Kishcha, P., and Stupp, A.: Predominant transport paths of Saharan dust over the Mediterranean Sea to Europe, *Journal of Geophysical Research: Atmospheres*, 117, n/a–n/a, <https://doi.org/10.1029/2011JD016482>, d02205, 2012.
- Kazadzis, S., Bais, A., Amiridis, V., Balis, D., Meleti, C., Kouremeti, N., Zerefos, C. S., Rapsomanikis, S., Petrakakis, M., Kelesis, A., Tzoumaka, P., and Kelektsoglou, K.: Nine years of UV aerosol optical depth measurements at Thessaloniki, Greece, *Atmospheric Chemistry and Physics*, 7, 2091–2101, <https://doi.org/10.5194/acp-7-2091-2007>, 2007.

- Kazadzis, S., Raptis, P., Kouremeti, N., Amiridis, V., Arola, A., Gerasopoulos, E., and Schuster, G. L.: Aerosol absorption retrieval at ultraviolet wavelengths in a complex environment, *Atmospheric Measurement Techniques*, 9, 5997–6011, <https://doi.org/10.5194/amt-9-5997-2016>, 2016.
- Klett, J. D.: Stable analytical inversion solution for processing lidar returns, *Appl. Opt.*, 20, 211–220, <https://doi.org/10.1364/AO.20.000211>, 1981.
- Löndahl, J., Swietlicki, E., Lindgren, E., and Loft, S.: Aerosol exposure versus aerosol cooling of climate: what is the optimal emission reduction strategy for human health?, *Atmospheric Chemistry and Physics*, 10, 9441–9449, <https://doi.org/10.5194/acp-10-9441-2010>, 2010.
- Lopatin, A., Dubovik, O., Chaikovsky, A., Goloub, P., Lapyonok, T., Tanré, D., and Litvinov, P.: Enhancement of aerosol characterization using synergy of lidar and sun-photometer coincident observations: the GARRLiC algorithm, *Atmospheric Measurement Techniques*, 6, 2065–2088, <https://doi.org/10.5194/amt-6-2065-2013>, 2013.
- López-Solano, J., Redondas, A., Carlund, T., Rodriguez-Franco, J. J., Diémoz, H., León-Luis, S. F., Hernández-Cruz, B., Guirado-Fuentes, C., Kouremeti, N., Gröbner, J., Kazadzis, S., Carreño, V., Berjón, A., Santana-Díaz, D., Rodríguez-Valido, M., De Bock, V., Moreta, J. R., Rimmer, J., Boulkelia, L., Jepsen, N., Eriksen, P., Bais, A. F., Shiroto, V., Vilaplana, J. M., Wilson, K. M., and Karppinen, T.: Aerosol optical depth in the European Brewer Network, *Atmospheric Chemistry and Physics Discussions*, 2017, 1–25, <https://doi.org/10.5194/acp-2017-1003>, 2017.
- Marinou, E., Amiridis, V., Biniotoglou, I., Tsikerdekis, A., Solomos, S., Proestakis, E., Konsta, D., Papagiannopoulos, N., Tsekeri, A., Vlastou, G., Zanis, P., Balis, D., Wandinger, U., and Ansmann, A.: Three-dimensional evolution of Saharan dust transport towards Europe based on a 9-year EARLINET-optimized CALIPSO dataset, *Atmospheric Chemistry and Physics*, 17, 5893–5919, <https://doi.org/10.5194/acp-17-5893-2017>, 2017.
- Matthias, V. and Bösenberg, J.: Aerosol climatology for the planetary boundary layer derived from regular lidar measurements, *Atmospheric Research*, 63, 221 – 245, [https://doi.org/https://doi.org/10.1016/S0169-8095\(02\)00043-1](https://doi.org/https://doi.org/10.1016/S0169-8095(02)00043-1), 2002.
- Mauderly, J. L. and Chow, J. C.: Health Effects of Organic Aerosols, *Inhalation Toxicology*, 20, 257–288, <https://doi.org/10.1080/08958370701866008>, PMID: 18300047, 2008.
- McCarty, J. L., Krylov, A., Prishchepov, A. V., Banach, D. M., Tyukavina, A., Potapov, P., and Turubanova, S.: Agricultural Fires in European Russia, Belarus, and Lithuania and Their Impact on Air Quality, 2002–2012, pp. 193–221, Springer International Publishing, Cham, [https://doi.org/10.1007/978-3-319-42638-9\\_9](https://doi.org/10.1007/978-3-319-42638-9_9), 2017.
- Mehta, S. K., Ratnam, M. V., Sunilkumar, S. V., Rao, D. N., and Krishna Murthy, B. V.: Diurnal variability of the atmospheric boundary layer height over a tropical station in the Indian monsoon region, *Atmospheric Chemistry and Physics*, 17, 531–549, <https://doi.org/10.5194/acp-17-531-2017>, 2017.
- Menut, L., Flamant, C., Pelon, J., and Flamant, P. H.: Urban boundary-layer height determination from lidar measurements over the Paris area, *Appl. Opt.*, 38, 945–954, <https://doi.org/10.1364/AO.38.000945>, 1999.
- Mona, L., Amodeo, A., Pandolfi, M., and Pappalardo, G.: Saharan dust intrusions in the Mediterranean area: Three years of Raman lidar measurements, *Journal of Geophysical Research: Atmospheres*, 111, n/a–n/a, <https://doi.org/10.1029/2005JD006569>, d16203, 2006.
- Müller, D., Ansmann, A., Mattis, I., Tesche, M., Wandinger, U., Althausen, D., and Pisani, G.: Aerosol-type-dependent lidar ratios observed with Raman lidar, *Journal of Geophysical Research: Atmospheres*, 112, n/a–n/a, <https://doi.org/10.1029/2006JD008292>, d16202, 2007.

- Nicolae, D., Nemuc, A., Müller, D., Talianu, C., Vasilescu, J., Belegante, L., and Kolgotin, A.: Characterization of fresh and aged biomass burning events using multiwavelength Raman lidar and mass spectrometry, *Journal of Geophysical Research: Atmospheres*, 118, 2956–2965, <https://doi.org/10.1002/jgrd.50324>, 2013.
- Papayannis, A., Mamouri, R. E., Amiridis, V., Kazadzis, S., Pérez, C., Tsaknakis, G., Kokkalis, P., and Baldasano, J. M.: Systematic lidar observations of Saharan dust layers over Athens, Greece in the frame of EARLINET project (2004&ndash;2006), *Annales Geophysicae*, 27, 3611–3620, <https://doi.org/10.5194/angeo-27-3611-2009>, 2009.
- Papayannis, A., Nicolae, D., Kokkalis, P., Biniotoglou, I., Talianu, C., Belegante, L., Tsaknakis, G., Cazacu, M., Vetres, I., and Ilic, L.: Optical, size and mass properties of mixed type aerosols in Greece and Romania as observed by synergy of lidar and sunphotometers in combination with model simulations: A case study, *Science of The Total Environment*, 500-501, 277 – 294, <https://doi.org/https://doi.org/10.1016/j.scitotenv.2014.08.101>, 2014.
- Pappalardo, G., Amodeo, A., Pandolfi, M., Wandinger, U., Ansmann, A., Bösenberg, J., Matthias, V., Amiridis, V., Tomasi, F. D., Frioud, M., Iarlori, M., Komguem, L., Papayannis, A., Rocadenbosch, F., and Wang, X.: Aerosol lidar intercomparison in the framework of the EARLINET project. 3. Ramanlidar algorithm for aerosol extinction, backscatter, and lidar ratio, *Appl. Opt.*, 43, 5370–5385, <https://doi.org/10.1364/AO.43.005370>, 2004.
- Pappalardo, G., Mona, L., D’Amico, G., Wandinger, U., Adam, M., Amodeo, A., Ansmann, A., Apituley, A., Alados Arboledas, L., Balis, D., Boselli, A., Bravo-Aranda, J. A., Chaikovsky, A., Comeron, A., Cuesta, J., De Tomasi, F., Freudenthaler, V., Gausa, M., Giannakaki, E., Giehl, H., Giunta, A., Grigorov, I., Groß, S., Haeffelin, M., Hiebsch, A., Iarlori, M., Lange, D., Linné, H., Madonna, F., Mattis, I., Mamouri, R.-E., McAuliffe, M. A. P., Mitev, V., Molero, F., Navas-Guzman, F., Nicolae, D., Papayannis, A., Perrone, M. R., Pietras, C., Pietruczuk, A., Pisani, G., Preißler, J., Pujadas, M., Rizi, V., Ruth, A. A., Schmidt, J., Schnell, F., Seifert, P., Serikov, I., Sicard, M., Simeonov, V., Spinelli, N., Stebel, K., Tesche, M., Trickl, T., Wang, X., Wagner, F., Wiegner, M., and Wilson, K. M.: Four-dimensional distribution of the 2010 Eyjafjallajökull volcanic cloud over Europe observed by EARLINET, *Atmospheric Chemistry and Physics*, 13, 4429–4450, <https://doi.org/10.5194/acp-13-4429-2013>, 2013.
- Pappalardo, G., Amodeo, A., Apituley, A., Comeron, A., Freudenthaler, V., Linné, H., Ansmann, A., Bösenberg, J., D’Amico, G., Mattis, I., Mona, L., Wandinger, U., Amiridis, V., Alados-Arboledas, L., Nicolae, D., and Wiegner, M.: EARLINET: towards an advanced sustainable European aerosol lidar network, *Atmospheric Measurement Techniques*, 7, 2389–2409, <https://doi.org/10.5194/amt-7-2389-2014>, 2014.
- Sasano, Y. and Nakane, H.: Significance of the extinction/backscatter ratio and the boundary value term in the solution for the two-component lidar equation, *Appl. Opt.*, 23, 11\_1–13, [https://doi.org/10.1364/AO.23.0011\\_1](https://doi.org/10.1364/AO.23.0011_1), 1984.
- Schneider, J., Balis, D., Böckmann, C., Bösenberg, J., Calpini, B., Chaikovsky, A., Comeron, A., Flamant, P., Freudenthaler, V., Hågård, A., Mattis, I., Mitev, V., Papayannis, A., Pappalardo, G., Pelon, J., Perrone, M., Resendes, D., Spinelli, N., Trickl, T., Vaughan, G., and Visconti, G.: European aerosol research lidar network to establish an aerosol climatology (EARLINET), *Journal of Aerosol Science*, 31, S592–S593, cited By 15, 2000.
- Schneider, M., Redondas, A., Hase, F., Guirado, C., Blumenstock, T., and Cuevas, E.: Comparison of ground-based Brewer and FTIR total column O<sub>3</sub> monitoring techniques, *Atmospheric Chemistry and Physics*, 8, 5535–5550, <https://doi.org/10.5194/acp-8-5535-2008>, 2008.
- She, C. Y., Alvarez, R. J., Caldwell, L. M., and Krueger, D. A.: High-spectral-resolution Rayleigh–Mie lidar measurement of aerosol and atmospheric profiles, *Opt. Lett.*, 17, 541–543, <https://doi.org/10.1364/OL.17.000541>, 1992.
- Siomos, N., Balis, D. S., Poupkou, A., Liora, N., Dimopoulos, S., Melas, D., Giannakaki, E., Filioglou, M., Basart, S., and Chaikovsky, A.: Investigating the quality of modeled aerosol profiles based on combined lidar and sunphotometer data, *Atmospheric Chemistry and Physics*, 17, 7003–7023, <https://doi.org/10.5194/acp-17-7003-2017>, 2017.



- Soni, K., Singh, S., Bano, T., Tanwar, R. S., and Nath, S.: Wavelength Dependence of the Aerosol Angstrom Exponent and Its Implications Over Delhi, India, *Aerosol Science and Technology*, 45, 1488–1498, <https://doi.org/10.1080/02786826.2011.601774>, 2011.
- 5 Stefan, K., Declan, O., Philip, S., Silvia, K., Kai, Z., Hauke, S., Sebastian, R., Marco, G., F., E. T., and Bjorn, S.: MAC-v1: A new global aerosol climatology for climate studies, *Journal of Advances in Modeling Earth Systems*, 5, 704–740, <https://doi.org/10.1002/jame.20035>, 2013.
- Takemura, T., Nakajima, T., Dubovik, O., Holben, B. N., and Kinne, S.: Single-Scattering Albedo and Radiative Forcing of Various Aerosol Species with a Global Three-Dimensional Model, *Journal of Climate*, 15, 333–352, [https://doi.org/10.1175/1520-0442\(2002\)015<0333:SSAARF>2.0.CO;2](https://doi.org/10.1175/1520-0442(2002)015<0333:SSAARF>2.0.CO;2), 2002.
- 10 Tomasi, F. D. and Perrone, M. R.: PBL and dust layer seasonal evolution by lidar and radiosounding measurements over a peninsular site, *Atmospheric Research*, 80, 86 – 103, <https://doi.org/http://dx.doi.org/10.1016/j.atmosres.2005.06.010>, 2006.
- Tyrlis, E. and Lelieveld, J.: Climatology and Dynamics of the Summer Etesian Winds over the Eastern Mediterranean, *Journal of the Atmospheric Sciences*, 70, 3374–3396, <https://doi.org/10.1175/JAS-D-13-035.1>, 2013.
- 15 Wandinger, U. and Ansmann, A.: Experimental determination of the lidar overlap profile with Raman lidar, *Appl. Opt.*, 41, 511–514, <https://doi.org/10.1364/AO.41.000511>, 2002.
- Welton, E. J., Campbell, J. R., Spinhirne, J. D., and Scott, V. S.: Global monitoring of clouds and aerosols using a network of micropulse lidar systems, *Proc.SPIE*, 4153, 4153 – 4153 – 8, <https://doi.org/10.1117/12.417040>, 2001.
- Winker, D. M., Vaughan, M. A., Omar, A., Hu, Y., Powell, K. A., Liu, Z., Hunt, W. H., and Young, S. A.: Overview of the
- 20 CALIPSO Mission and CALIOP Data Processing Algorithms, *Journal of Atmospheric and Oceanic Technology*, 26, 2310–2323, <https://doi.org/10.1175/2009JTECHA1281.1>, 2009.
- Yiquan, J., Xiu-Qun, Y., and Xiaohong, L.: Seasonality in anthropogenic aerosol effects on East Asian climate simulated with CAM5, *Journal of Geophysical Research: Atmospheres*, 120, 10,837–10,861, <https://doi.org/10.1002/2015JD023451>, 2015.

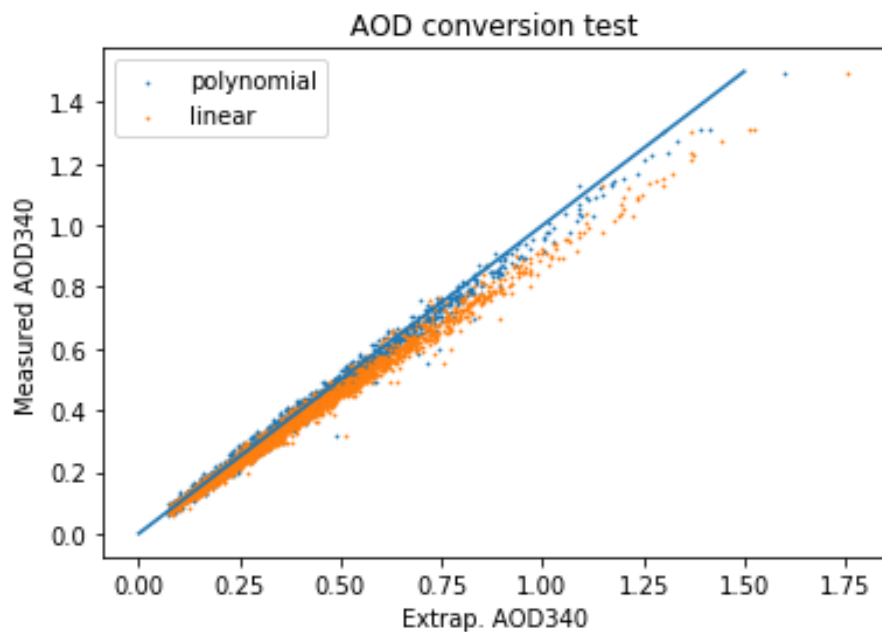

**Figure 1.** Scatter-plot of the measured sunphotometer AOD at 340nm against the extrapolated AOD at 340nm. Two methods of extrapolation are presented. The 'linear' approach assumes a linear behavior of the logarithm of the AOD in the spectral region 340-1020nm, while the polynomial approach assumes a 2nd order polynomial behavior. The unity line is also included.

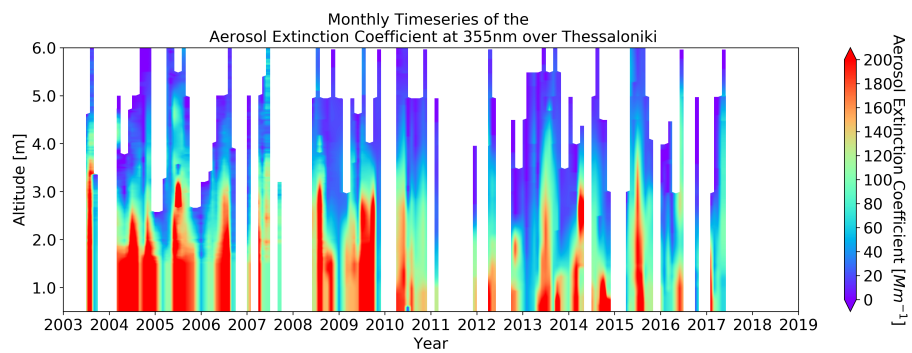

**Figure 2.** Time-height cross section of the monthly mean aerosol extinction coefficient at 355nm in the period 2003-2017.

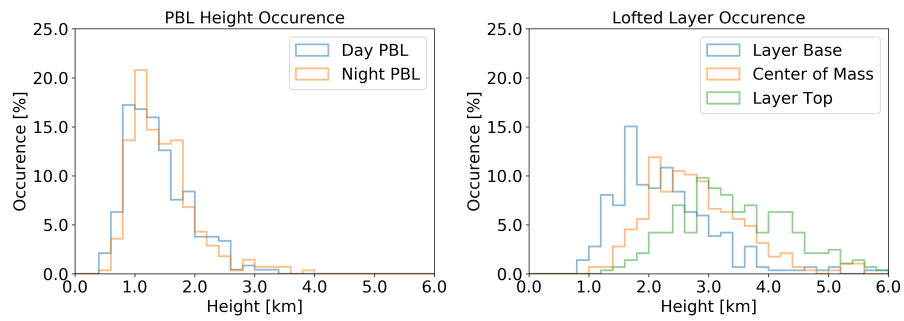

**Figure 3.** Histograms of the Daytime and Nighttime PBL top (left) and the first lofted layer base, center of mass and top height distributions (right). The height classes range is set to 200 m.

### Annual monthly boxplots of some of the optical and geometrical aerosol properties in Thessaloniki.

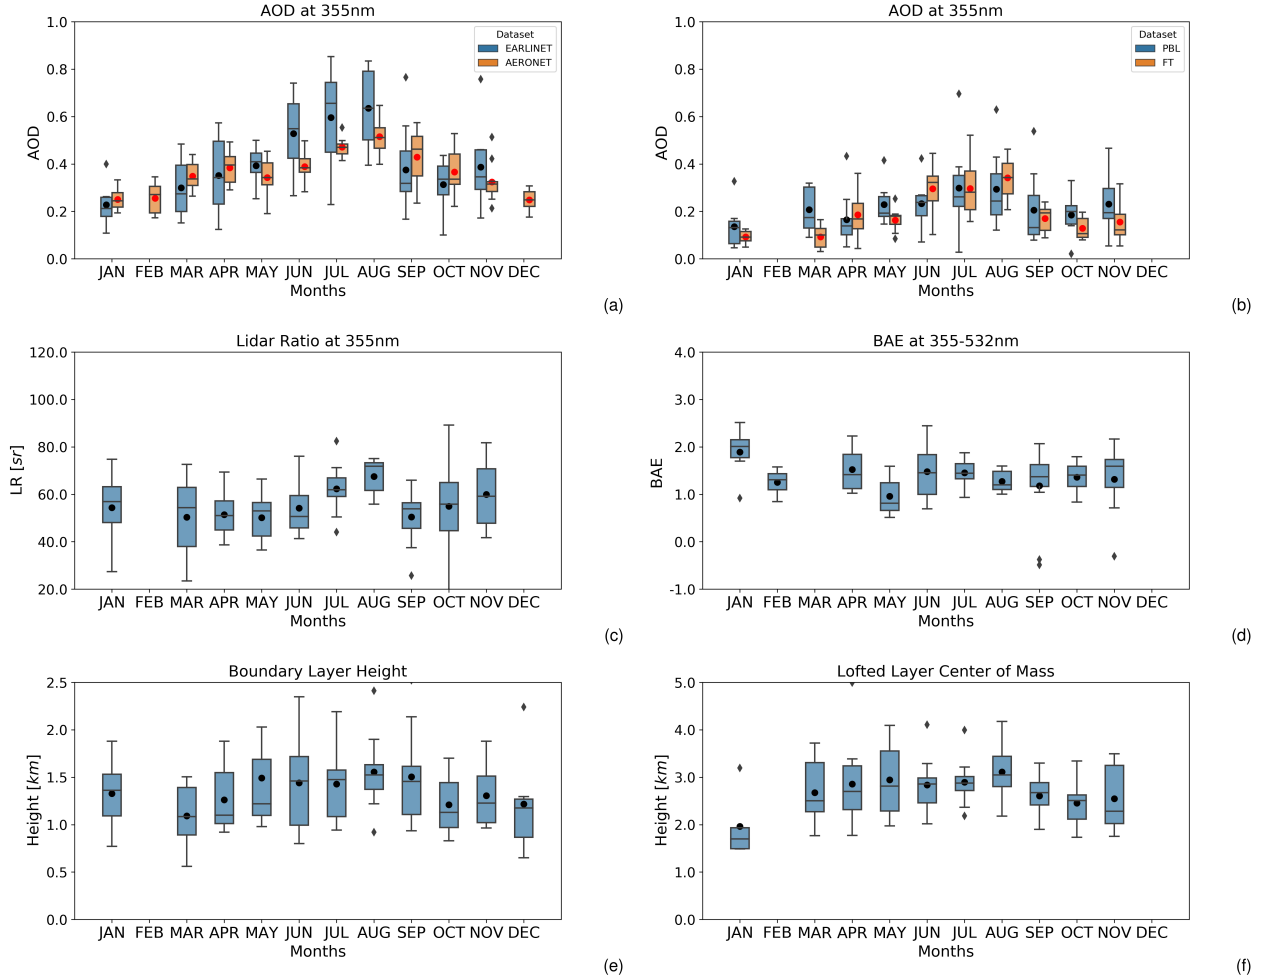

**Figure 4.** The annual cycle of the monthly mean columnar products. The AOD at 355nm in the whole column (a) but also in the PBL and the FT (b), the **integrated backscatter at 355nm (c)** and **at 532nm (d)**, the mean lidar ratio at 355nm (e), the mean BAE at 532-532nm (f), the mean PBL height (g) and the mean lofted layer center of mass (h) are included in this figure. The AERONET mean AOD at 355nm is also displayed in (a) **and is regarded as reference data**. In our analysis, the boxplot whiskers correspond to the most distant value encountered within 1.5 times the interquartile range above the upper and lower quantiles.

## Seasonal mean optical properties profiles for Thessaloniki

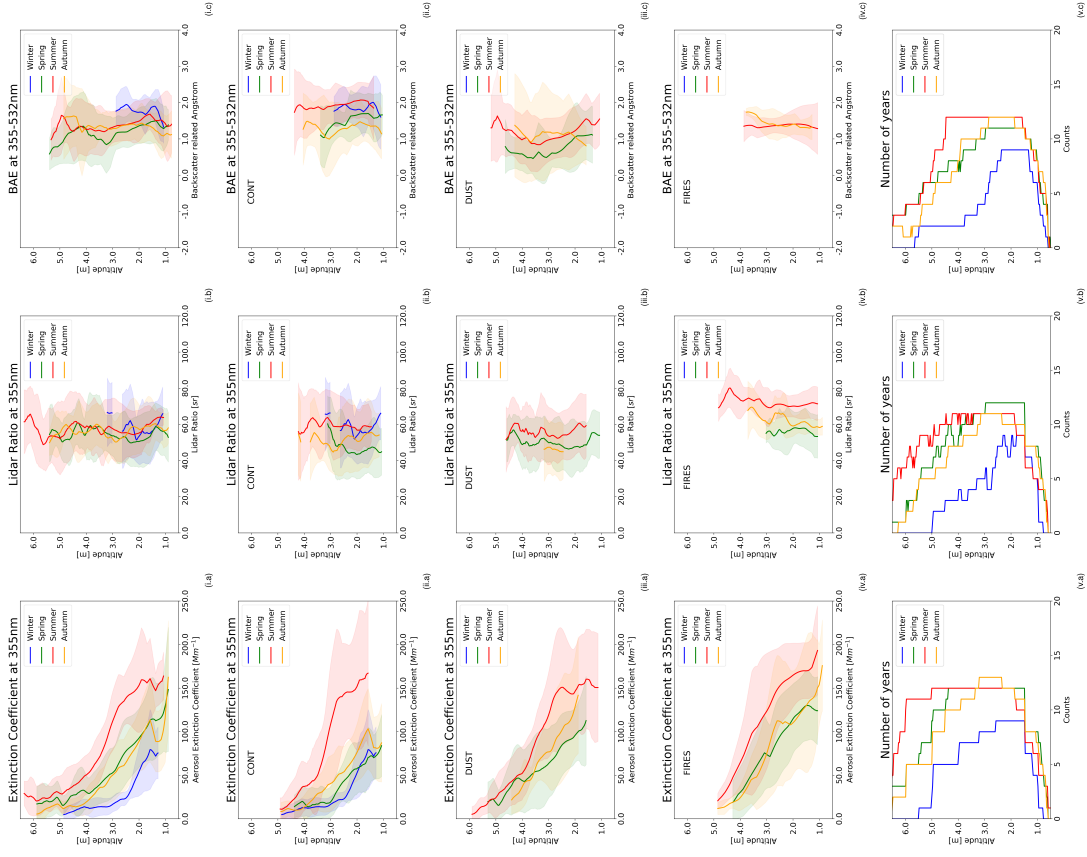

**Figure 5.** Seasonal profiles of the main aerosol optical properties under study. Rows (i), (ii), (iii), and (iv) correspond to the measurement categories "all", "continental", "dust mixtures", and "fresh biomass mixtures" (see section 4.2.2) respectively while row (v) corresponds to the number of measurements profiles of the category "all". The profiles of the extinction coefficient at 355nm, the backscatter coefficient at 355nm, the backscatter coefficient at 532nm, the lidar ratio at 355nm and the BAE at 355-532nm are presented in columns (a), (b), (c), (d) and (e) respectively.

**Timeseries of the AOD at 355nm over Thessaloniki**

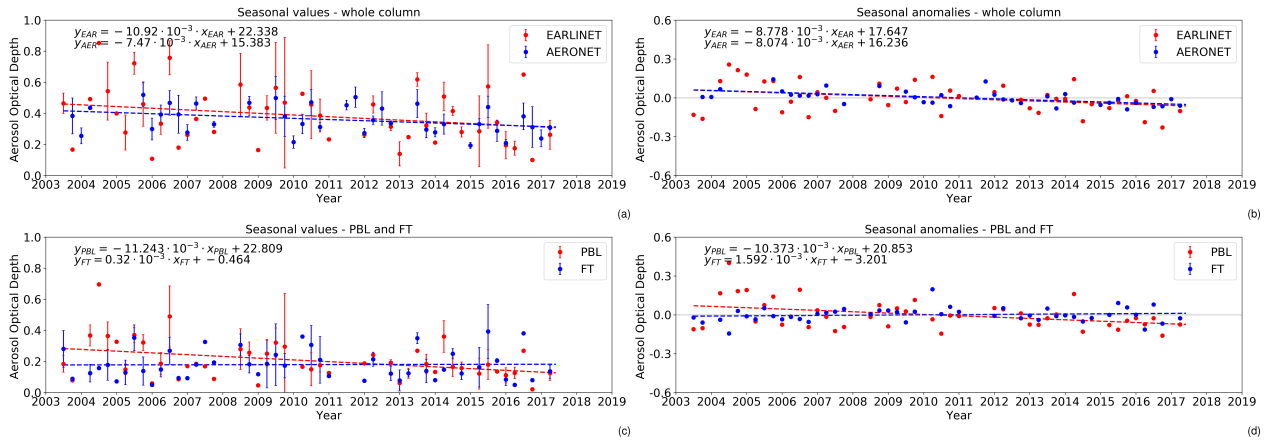

**Figure 6.** Timeseries of the seasonal mean AOD values at 355nm (a) and of the respective seasonal anomalies (b) that are produced after removing the seasonality for the whole column. The AERONET dataset is displayed along the EARLINET dataset for (a) and (b). Similar timeseries from the EARLINET dataset AOD in the PBL and in the FT are presented in (c) and (d) for the mean values and the anomalies respectively. The linear fit line is also included in the figures. For (b) and (d) it represents the AOD 355nm trend in the period 2003-2017.

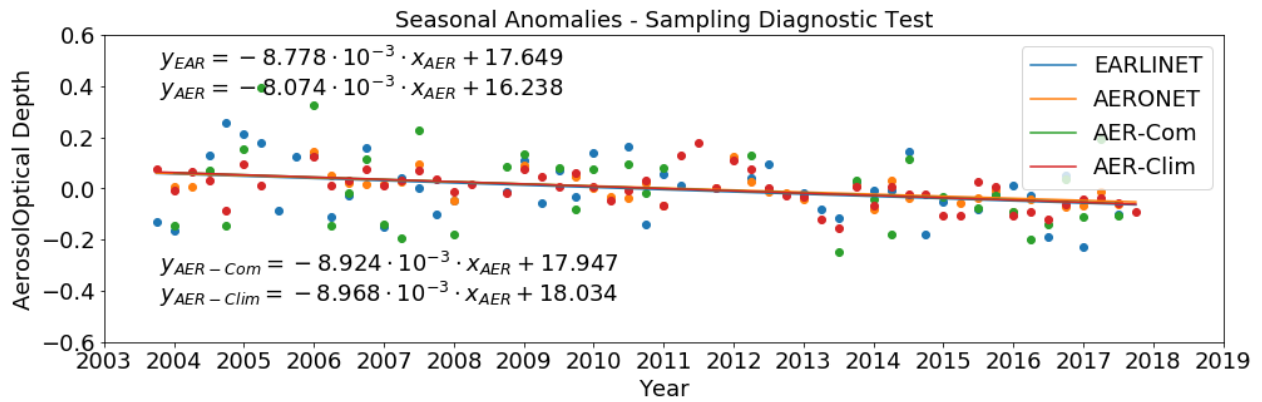

**Figure 7.** Timeseries of the seasonal AOD anomalies at 355nm. The original EARLINET timeseries is marked with blue while the original AERONET timeseries with orange. Two different sampling tests are performed on the AERONET dataset. The "AER-Clim" timeseries contains only Monday and Thursday measurements and it is marked with red while the "AER-Com" timeseries contains only common lidar and sunphotometer cases and it is marked with green.



**Table 1.** Metrics of the aerosol geometrical properties.

|                | Median                      | Upper Quantile (75%)        | Lower Quantile (25%)        | Interquantile Range         | Upper Wisker                | Lower Wisker                |
|----------------|-----------------------------|-----------------------------|-----------------------------|-----------------------------|-----------------------------|-----------------------------|
| Day PBL        | <del>1.29</del> <u>1.22</u> | <del>1.68</del> <u>1.62</u> | <del>0.99</del> <u>0.98</u> | <del>0.69</del> <u>0.64</u> | <del>2.62</del> <u>2.51</u> | <del>0.57</del> <u>0.74</u> |
| Night PBL      | <del>1.38</del> <u>1.25</u> | <del>1.74</del> <u>1.72</u> | <del>1.08</del> <u>0.96</u> | <del>0.66</del> <u>0.75</u> | <del>2.61</del> <u>2.78</u> | <del>0.45</del> <u>0.71</u> |
| Layer Base     | <del>2.04</del> <u>1.86</u> | <del>2.61</del> <u>2.55</u> | <del>1.65</del> <u>1.61</u> | <del>0.96</del> <u>0.94</u> | <del>4.05</del> <u>3.92</u> | <del>0.87</del> <u>0.98</u> |
| Center of Mass | <del>2.59</del> <u>2.49</u> | <del>3.16</del> <u>2.99</u> | <del>2.11</del> <u>2.03</u> | <del>1.05</del> <u>0.96</u> | <del>4.64</del> <u>4.20</u> | <del>1.17</del> <u>1.35</u> |
| Layer Top      | <del>3.24</del> <u>3.14</u> | <del>4.07</del> <u>3.74</u> | <del>2.67</del> <u>2.49</u> | <del>1.40</del> <u>1.25</u> | <del>6.15</del> <u>5.03</u> | <del>1.38</del> <u>1.79</u> |
| Thickness      | <del>1.05</del> <u>0.91</u> | <del>1.59</del> <u>1.47</u> | <del>0.63</del> <u>0.69</u> | <del>0.96</del> <u>0.78</u> | <del>3.00</del> <u>2.55</u> | <del>0.27</del> <u>0.33</u> |

**Table 2.** Mean values and variability of the aerosol optical depth at 3555nm in the boundary layer and in the free troposphere. This seasonal values are produced from the respective monthly mean averages.

| Aerosol Optical Depth at 355nm |      |                                                           |                                                           |                                                           |                                                           |
|--------------------------------|------|-----------------------------------------------------------|-----------------------------------------------------------|-----------------------------------------------------------|-----------------------------------------------------------|
| Season                         | Type | All                                                       | Cont.                                                     | Dust <u>Mix.</u>                                          | <del>Fires</del> <u>Biom. Mix.</u>                        |
| Winter                         | PBL  | <del>0.13</del> <u>0.14</u> ± <del>0.08</del> <u>0.09</u> | <del>0.13</del> <u>0.14</u> ± <del>0.08</del> <u>0.09</u> | -                                                         | -                                                         |
|                                | FT   | <del>0.09</del> <u>0.08</u> ± 0.02                        | <del>0.09</del> <u>0.08</u> ± <del>0.03</del> <u>0.02</u> | -                                                         | -                                                         |
| Spring                         | PBL  | <del>0.21</del> <u>0.20</u> ± <del>0.10</del> <u>0.09</u> | 0.12 ± 0.05                                               | <del>0.22</del> <u>0.23</u> ± <del>0.07</del> <u>0.08</u> | <del>0.21</del> <u>0.20</u> ± <del>0.11</del> <u>0.10</u> |
|                                | FT   | <del>0.15</del> <u>0.16</u> ± 0.07                        | 0.11 ± 0.05                                               | 0.17 ± 0.08                                               | 0.18 ± 0.11                                               |
| Summer                         | PBL  | <del>0.29</del> <u>0.30</u> ± <del>0.13</del> <u>0.16</u> | 0.28 ± <del>0.22</del> <u>0.23</u>                        | <del>0.32</del> <u>0.31</u> ± <del>0.14</del> <u>0.15</u> | 0.24 ± 0.07                                               |
|                                | FT   | 0.30 ± 0.07                                               | <del>0.26</del> <u>0.27</u> ± <del>0.06</del> <u>0.08</u> | <del>0.28</del> <u>0.29</u> ± <del>0.12</del> <u>0.11</u> | <del>0.37</del> <u>0.39</u> ± <del>0.06</del> <u>0.09</u> |
| Autumn                         | PBL  | 0.18 ± 0.10                                               | 0.16 ± <del>0.10</del> <u>0.09</u>                        | <del>0.29</del> <u>0.31</u> ± <del>0.14</del> <u>0.17</u> | 0.23 ± 0.09                                               |
|                                | FT   | 0.15 ± <del>0.04</del> <u>0.05</u>                        | <del>0.13</del> <u>0.12</u> ± 0.04                        | <del>0.27</del> <u>0.28</u> ± 0.13                        | 0.21 ± 0.12                                               |

**Table 3.** Mean columnar values and variability of the lidar ratio at 355nm in the boundary layer and in the free troposphere. This seasonal values are produced from the respective monthly mean averages.

| Lidar Ratio at 355nm [sr] |      |                                                   |                                                   |                                                   |                                                 |
|---------------------------|------|---------------------------------------------------|---------------------------------------------------|---------------------------------------------------|-------------------------------------------------|
| Season                    | Type | All                                               | Cont.                                             | Dust <u>Mix.</u>                                  | <del>Fires</del> <u>Biom. Mix.</u>              |
| Winter                    | PBL  | <del>56</del> <u>55</u> ± <del>18</del> <u>19</u> | 56 ± <del>18</del> <u>19</u>                      | -                                                 | -                                               |
|                           | FT   | 57 ± 21                                           | 57 ± 21                                           | -                                                 | -                                               |
| Spring                    | PBL  | <del>48</del> <u>49</u> ± <del>12</del> <u>11</u> | <del>45</del> <u>47</u> ± 14                      | 47 ± 13                                           | <del>52</del> <u>51</u> ± 12                    |
|                           | FT   | <del>50</del> <u>51</u> ± <del>13</del> <u>12</u> | <del>45</del> <u>46</u> ± <del>12</del> <u>11</u> | <del>48</del> <u>47</u> ± <del>12</del> <u>13</u> | 61 ± 10                                         |
| Summer                    | PBL  | <del>60</del> <u>61</u> ± <del>12</del> <u>9</u>  | <del>58</del> <u>60</u> ± 15                      | <del>56</del> <u>60</u> ± <del>17</del> <u>14</u> | 73 ± 10                                         |
|                           | FT   | <del>60</del> <u>61</u> ± <del>11</del> <u>9</u>  | <del>58</del> <u>61</u> ± <del>14</del> <u>15</u> | <del>58</del> <u>61</u> ± <del>23</del> <u>21</u> | <del>72</del> <u>71</u> ± <del>6</del> <u>7</u> |
| Autumn                    | PBL  | <del>54</del> <u>53</u> ± <del>16</del> <u>17</u> | <del>55</del> <u>51</u> ± <del>23</del> <u>21</u> | <del>48</del> <u>45</u> ± <del>12</del> <u>13</u> | <del>62</del> <u>59</u> ± <del>9</del> <u>4</u> |
|                           | FT   | 57 ± 16                                           | <del>62</del> <u>58</u> ± <del>27</del> <u>26</u> | <del>49</del> <u>48</u> ± 15                      | <del>63</del> <u>61</u> ± 5                     |

**Table 4.** Mean columnar values and variability of the backscatter related ~~angstrom~~Angstrom exponent 355-532nm in the boundary layer and in the free troposphere. This seasonal values are produced from the respective monthly mean averages.

| Backscatter related Ang. Exponent 355-532nm |      |                                                       |                                                       |                                                       |                                                       |
|---------------------------------------------|------|-------------------------------------------------------|-------------------------------------------------------|-------------------------------------------------------|-------------------------------------------------------|
| Season                                      | Type | All                                                   | Cont.                                                 | Dust <u>Mix.</u>                                      | <del>Fires</del> <u>Biom. Mix.</u>                    |
| Winter                                      | PBL  | <del>1.1</del> <u>1.6</u> ± <del>1.1</del> <u>0.6</u> | <del>1.4</del> <u>1.7</u> ± <del>0.5</del> <u>0.6</u> | <del>-0.3</del> ± <del>1.5</del> <u>~</u>             | -                                                     |
|                                             | FT   | 1.7 ± <del>0.6</del> <u>0.3</u>                       | <del>1.9</del> <u>1.8</u> ± 0.6                       | <del>1.0</del> ± <del>1.0</del> <u>~</u>              | -                                                     |
| Spring                                      | PBL  | <del>1.0</del> <u>1.2</u> ± <del>0.6</del> <u>0.8</u> | <del>1.4</del> <u>1.7</u> ± <del>0.7</del> <u>0.4</u> | <del>0.9</del> <u>1.0</u> ± <del>0.6</del> <u>0.9</u> | <del>1.2</del> ± <del>0.5</del> <u>~</u>              |
|                                             | FT   | <del>1.1</del> <u>1.4</u> ± <del>0.3</del> <u>0.5</u> | <del>1.5</del> <u>1.7</u> ± 0.7                       | <del>0.8</del> <u>0.9</u> ± 0.6                       | <del>1.3</del> ± <del>0.3</del> <u>~</u>              |
| Summer                                      | PBL  | <del>1.6</del> <u>1.5</u> ± <del>0.8</del> <u>0.6</u> | <del>1.5</del> <u>1.8</u> ± <del>0.7</del> <u>0.6</u> | <del>1.5</del> <u>1.6</u> ± 0.5                       | <del>1.4</del> <u>1.3</u> ± <del>0.6</del> <u>0.8</u> |
|                                             | FT   | 1.3 ± 0.4                                             | <del>1.5</del> <u>1.9</u> ± <del>0.7</del> <u>0.5</u> | <del>0.7</del> <u>1.2</u> ± <del>0.5</del> <u>0.6</u> | <del>1.5</del> <u>1.4</u> ± <del>0.4</del> <u>0.3</u> |
| Autumn                                      | PBL  | <del>1.1</del> <u>1.0</u> ± <del>0.5</del> <u>1.0</u> | <del>1.1</del> <u>0.9</u> ± <del>0.6</del> <u>1.1</u> | 1.0 ± <del>0.9</del> <u>0.7</u>                       | 1.4 ± <del>0.5</del> <u>0.4</u>                       |
|                                             | FT   | <del>1.4</del> <u>1.3</u> ± <del>0.4</del> <u>0.5</u> | <del>1.5</del> <u>1.1</u> ± <del>0.6</del> <u>0.8</u> | <del>1.0</del> <u>1.5</u> ± <del>0.7</del> <u>0.6</u> | <del>1.5</del> <u>1.4</u> ± <del>0.4</del> <u>0.2</u> |
